# Supplementary material for: Aggregation of asphaltene model compounds using a porphyrin tethered to a carboxylic acid
Source: Royal Society of Chemistry journal article supplement (doi:10.1039/c5ob00836k), 2015-01-01
Supplement: c5ob00836k1.pdf [file c5ob00836k1.pdf]

## Electronic Supplementary Information

### Aggregation of asphaltene model compounds using a porphyrin tethered to a carboxylic acid

Matthias Schulze,<sup>a</sup> Marc P. Lechner,<sup>a</sup> Jeffrey M. Stryker,<sup>b</sup> and Rik R. Tykwinski<sup>a\*</sup>

<sup>a</sup>Department of Chemistry and Pharmacy & Interdisciplinary Center of Molecular Materials (ICMM), Friedrich-Alexander-Universität Erlangen-Nürnberg (FAU), Henkestraße 42, 91054 Erlangen, Germany. Fax: +49-9131-85-26865; Tel: +49-9131-85-22540; E-mail: rik.tykwinski@fau.de

<sup>b</sup>Department of Chemistry, University of Alberta, Edmonton, Alberta T6G 2G2, Canada

### Table of Contents

|                                                                                      |         |
|--------------------------------------------------------------------------------------|---------|
| <sup>1</sup> H and <sup>13</sup> C NMR spectra of compounds <b>3–10</b>              | S2–S17  |
| 2D NMR spectra for compound <b>4</b>                                                 | S18–S20 |
| NMR titrations measurements                                                          | S21–S36 |
| Study 1. NMR dilution titration of phenylacetic acid                                 | S21–S22 |
| Study 2. NMR titration of phenylacetic acid and pyridine                             | S23–S25 |
| Study 3. NMR dilution titration of model compound <b>4</b>                           | S26     |
| Study 4. NMR titration of phenylacetic acid and model compound <b>4</b>              | S27–29  |
| Study 5. NMR dilution titration of porphyrin <b>3</b>                                | S30–32  |
| Study 6. NMR titration of porphyrin <b>3</b> and pyridine                            | S32–34  |
| Study 7. NMR titration of porphyrin <b>3</b> and model compound <b>4</b>             | S34–36  |
| Study 8. Job's Plot from titration of porphyrin <b>3</b> and model compound <b>4</b> | S37     |
| Mass spectrum of <b>3•4</b>                                                          | S38     |

# $^1\text{H}$ and $^{13}\text{C}$ NMR spectra of compound 3-10

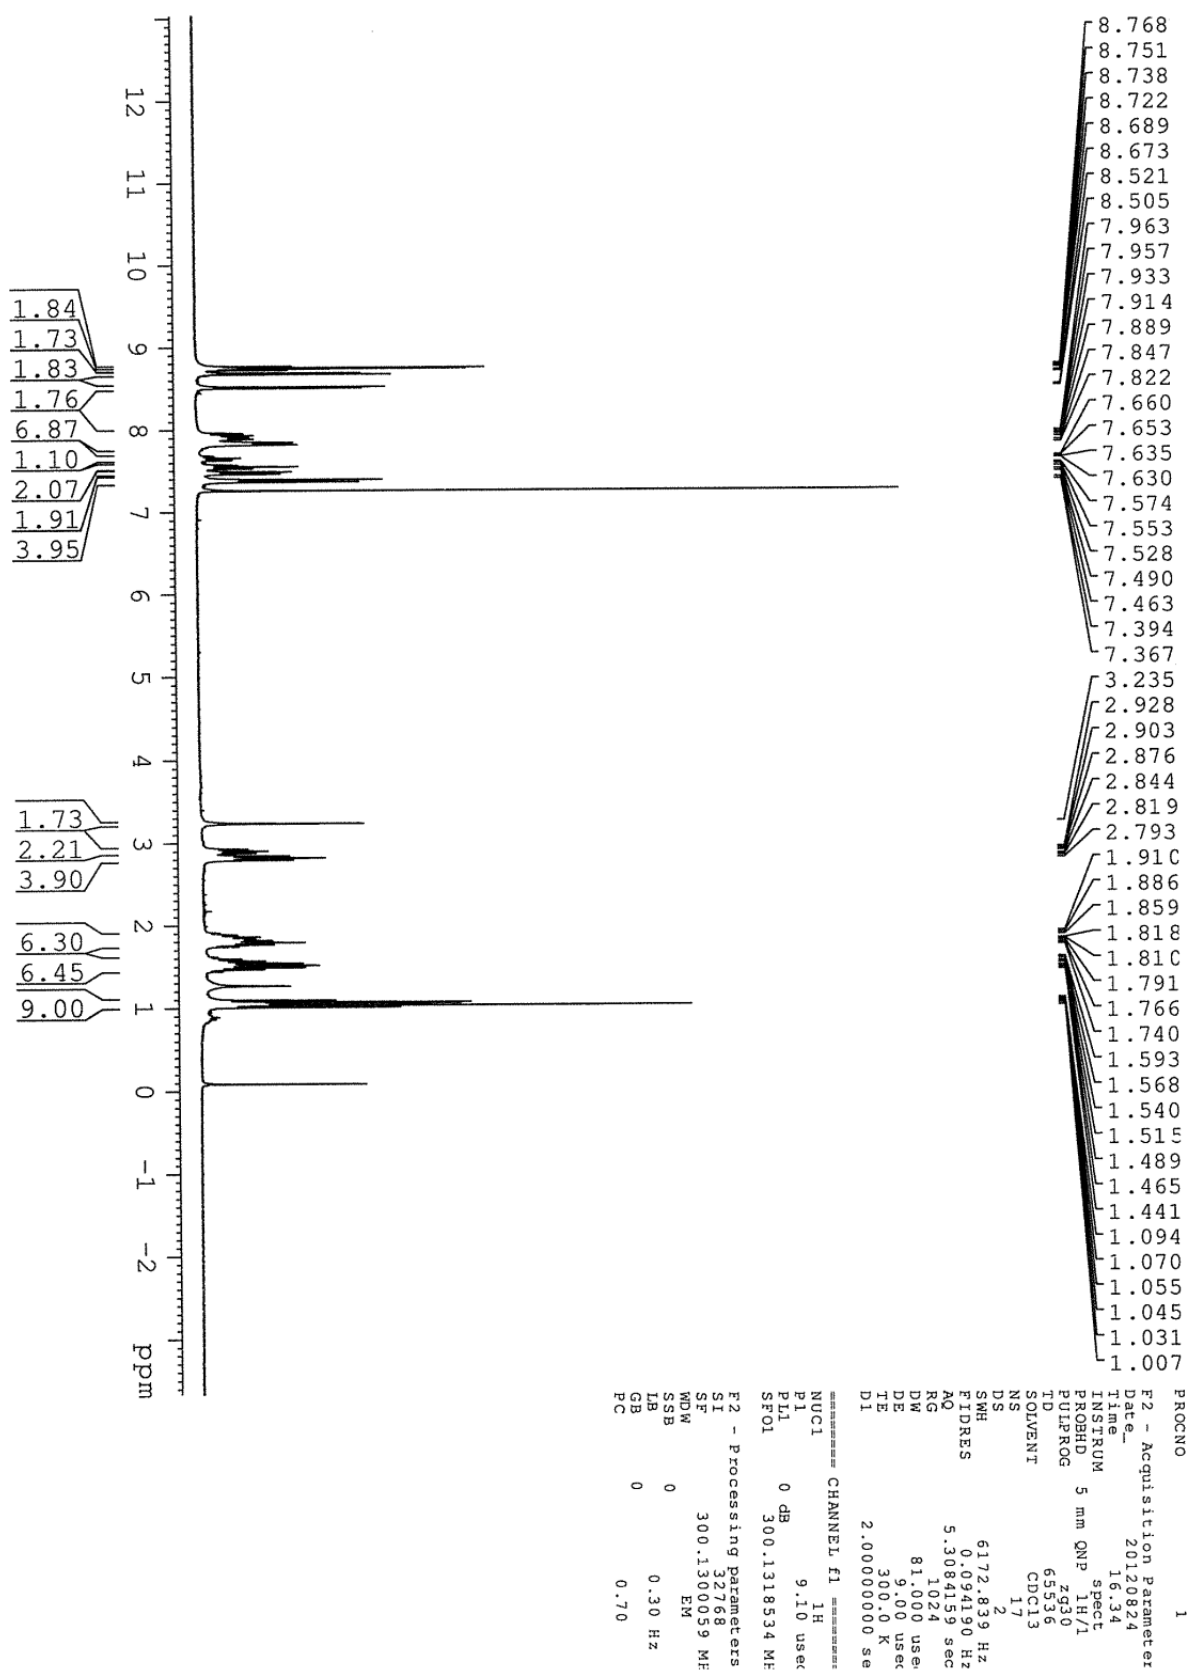

$^1\text{H}$  NMR spectrum (300 MHz,  $\text{CDCl}_3$ ) of porphyrin 3.

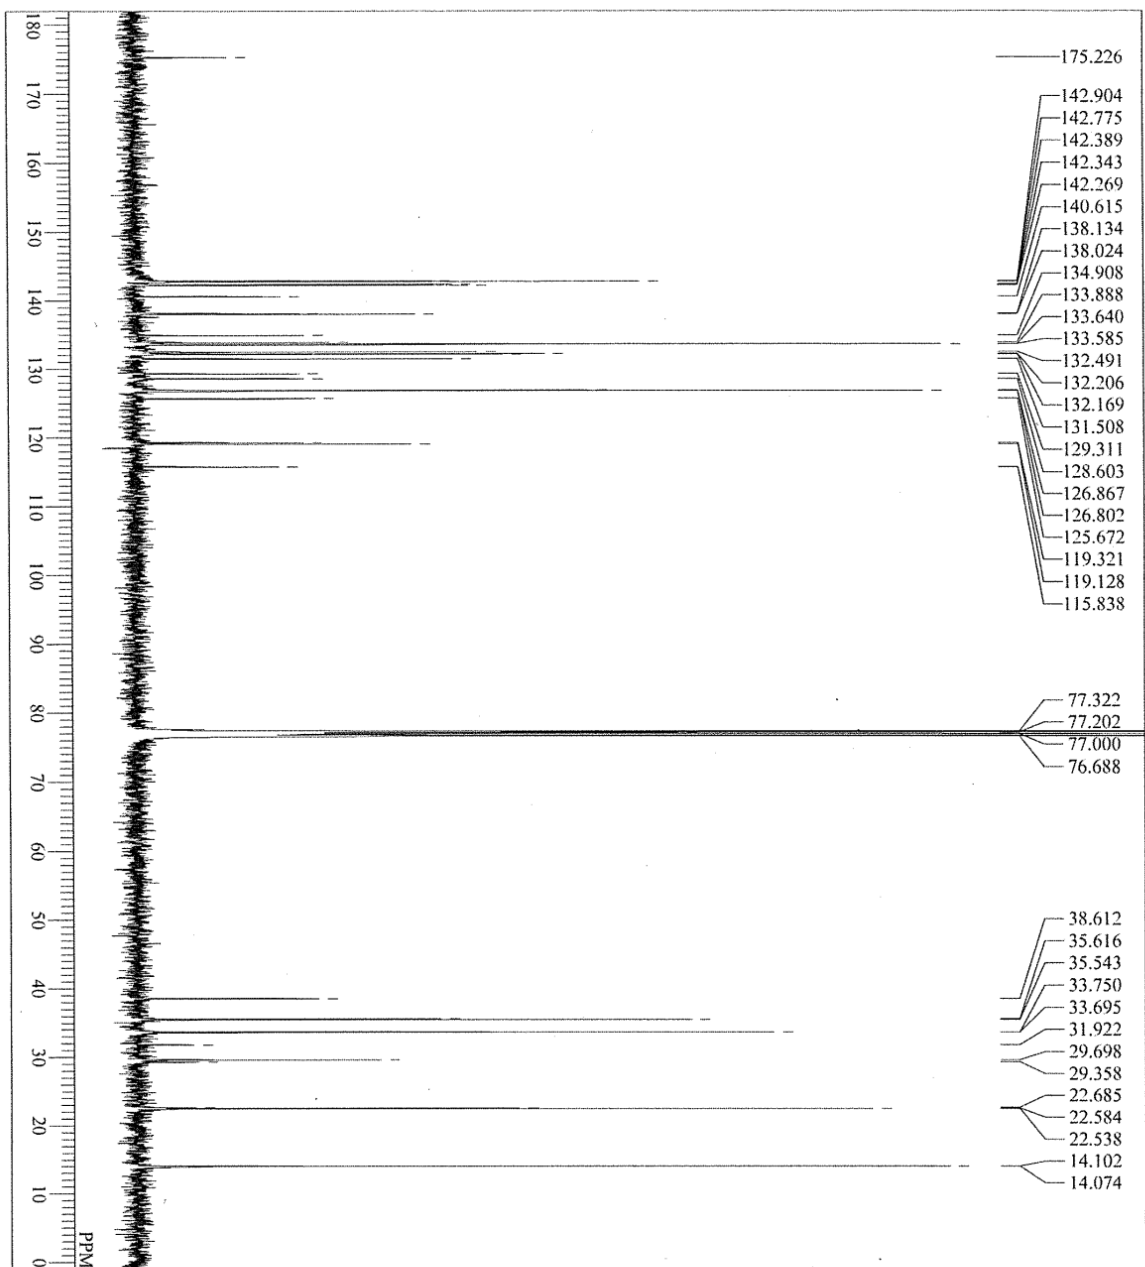

DATIM Wed Aug 08 12:14:40 2012  
 EXMOD BCM  
 OBNUC 13C  
 OFR 100.50 MHz  
 OBSSET 123.00 KHz  
 OBFIN 14039.2 Hz  
 IRNUC 1H  
 IFR 400.05 MHz  
 IRSET 120.00 KHz  
 IRFIN 10600.0 Hz  
 FREQU 30303.0 Hz  
 POINT 32768  
 SAMPO 32768  
 DUMMY 1  
 TIMES 10000  
 SCANS 7260  
 RESOL 0.92 Hz  
 PW1 5.3 us  
 PW2 10.0 us  
 PW3 10.0 us  
 P11 1.000 ms  
 P12 1.000 ms  
 P13 1.00 ms  
 ACQTM 1.081 sec  
 PD 6.000 sec  
 SLVNT CDCL3  
 CTMP 22.0 c  
 RGAIN 30  
 BF 1.50 Hz  
 EXREF 77.00 ppm  
 TMSP 20901

<sup>13</sup>C NMR spectrum (100 MHz, CDCl<sub>3</sub>) of porphyrin 3.

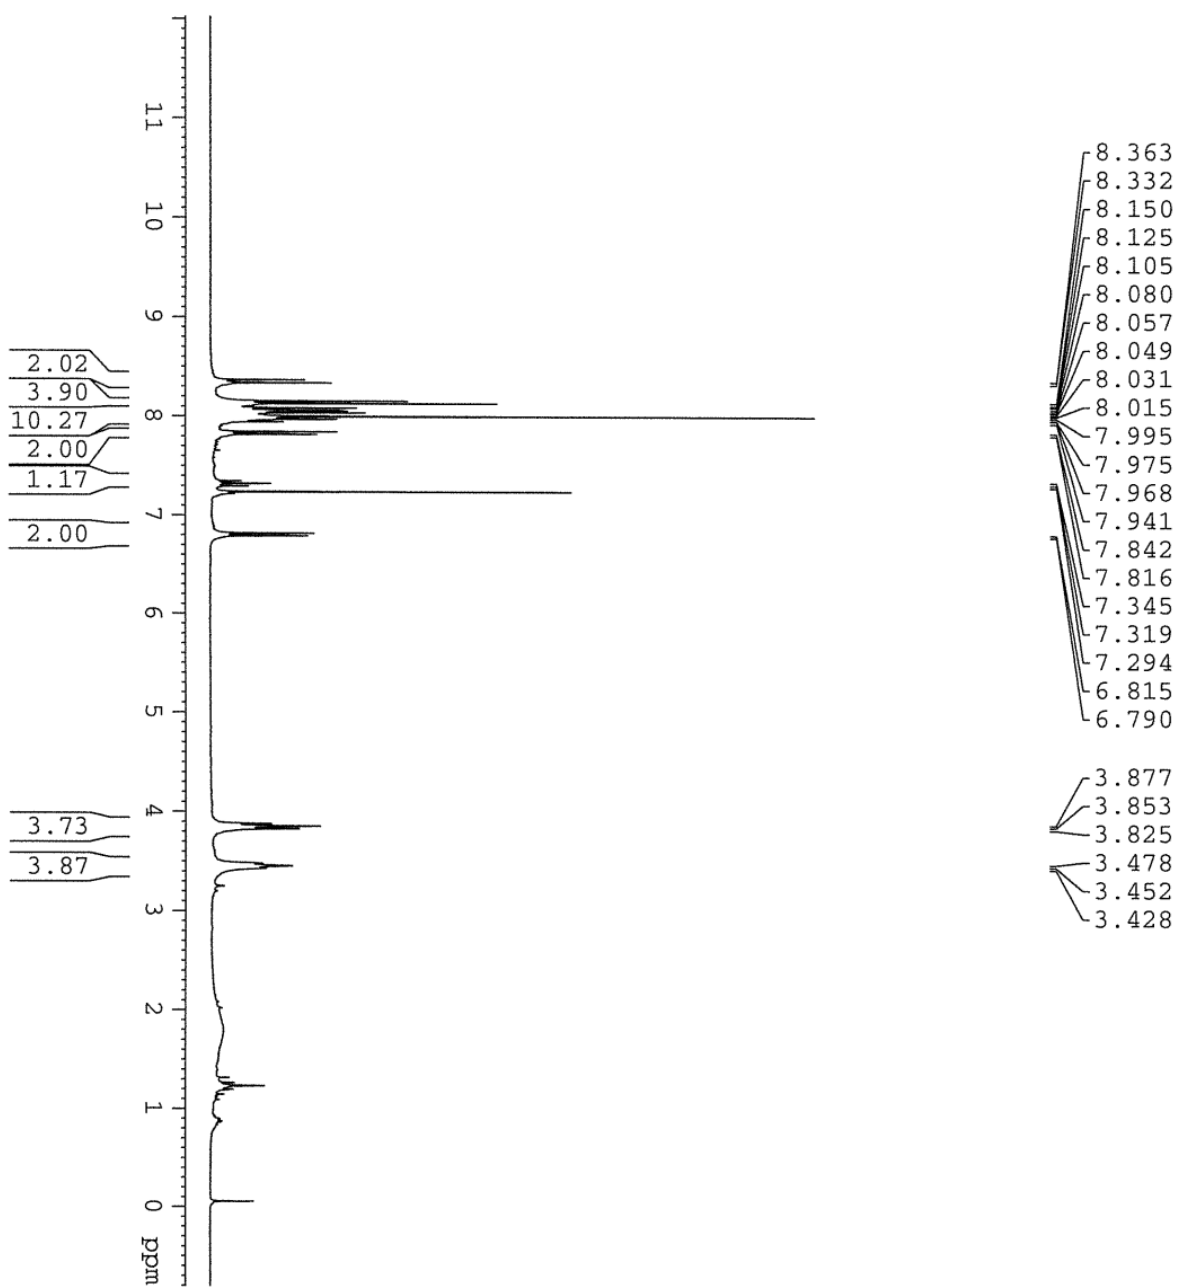

$^1\text{H}$  NMR spectrum (300 MHz,  $\text{CDCl}_3$ ) of compound 4.

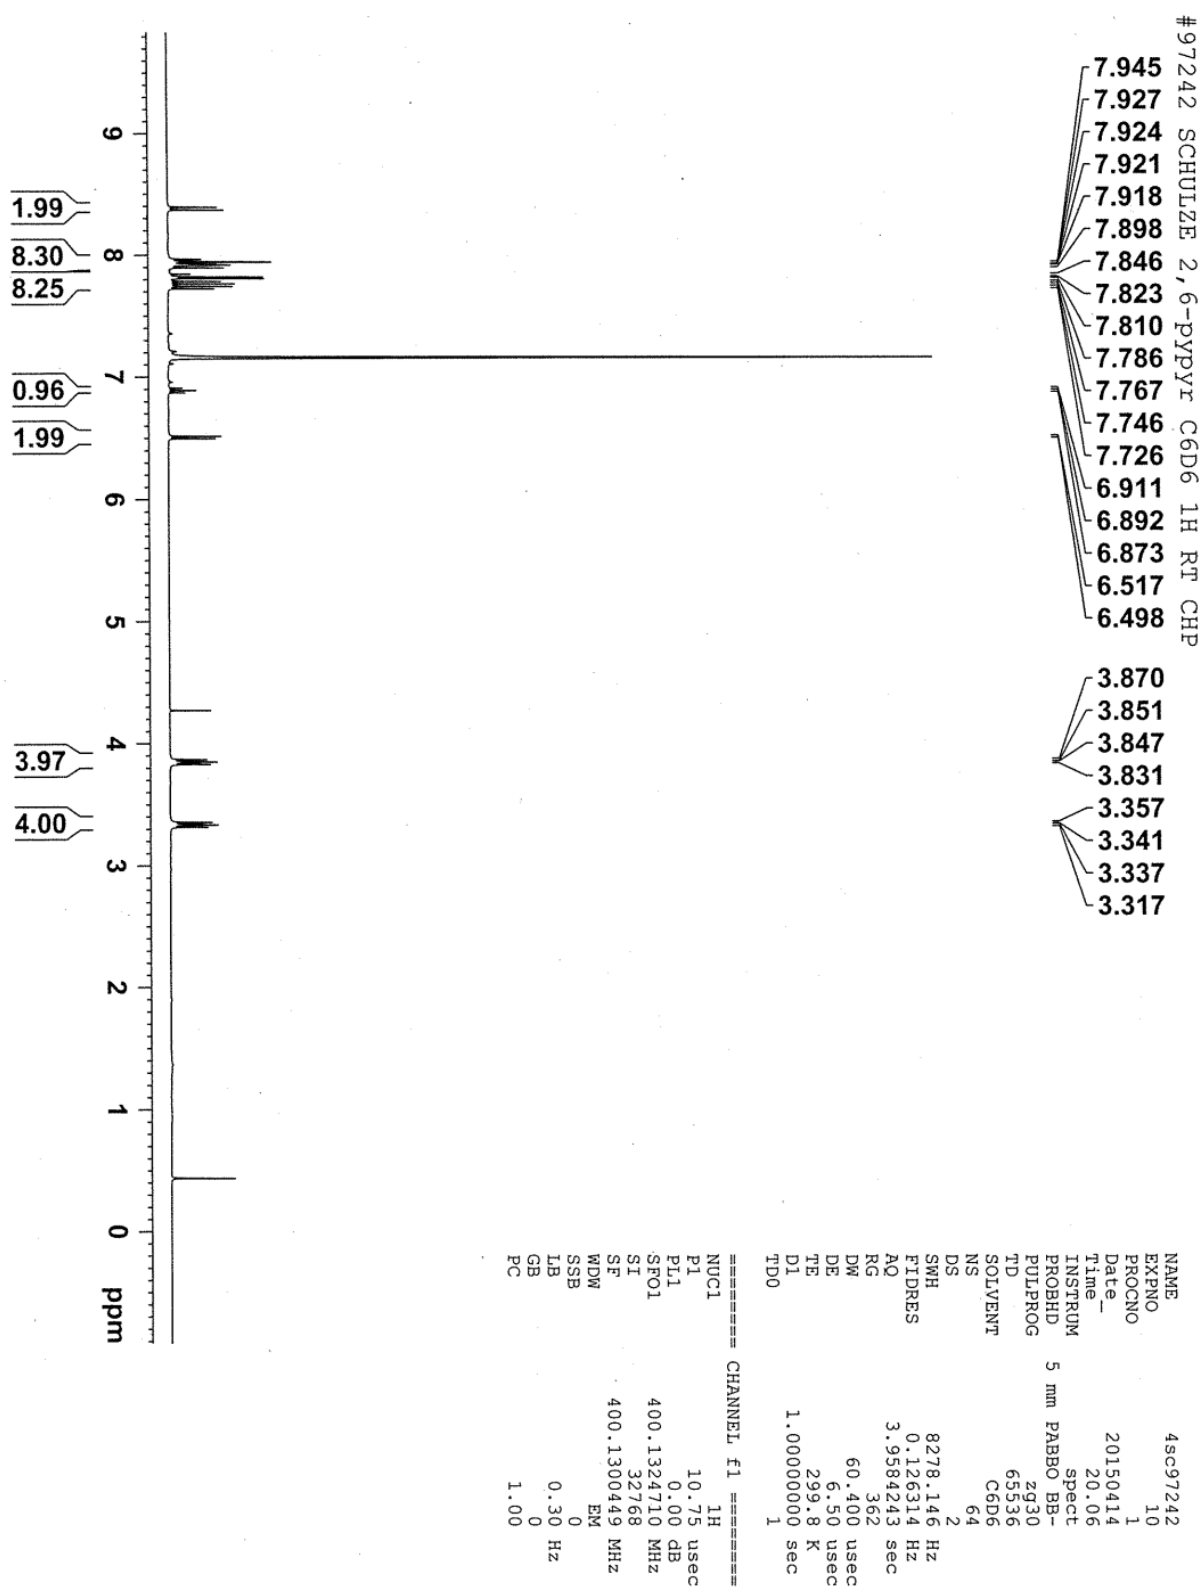

$^1\text{H}$  NMR spectrum (400 MHz,  $\text{C}_6\text{D}_6$ ) of compound 4.

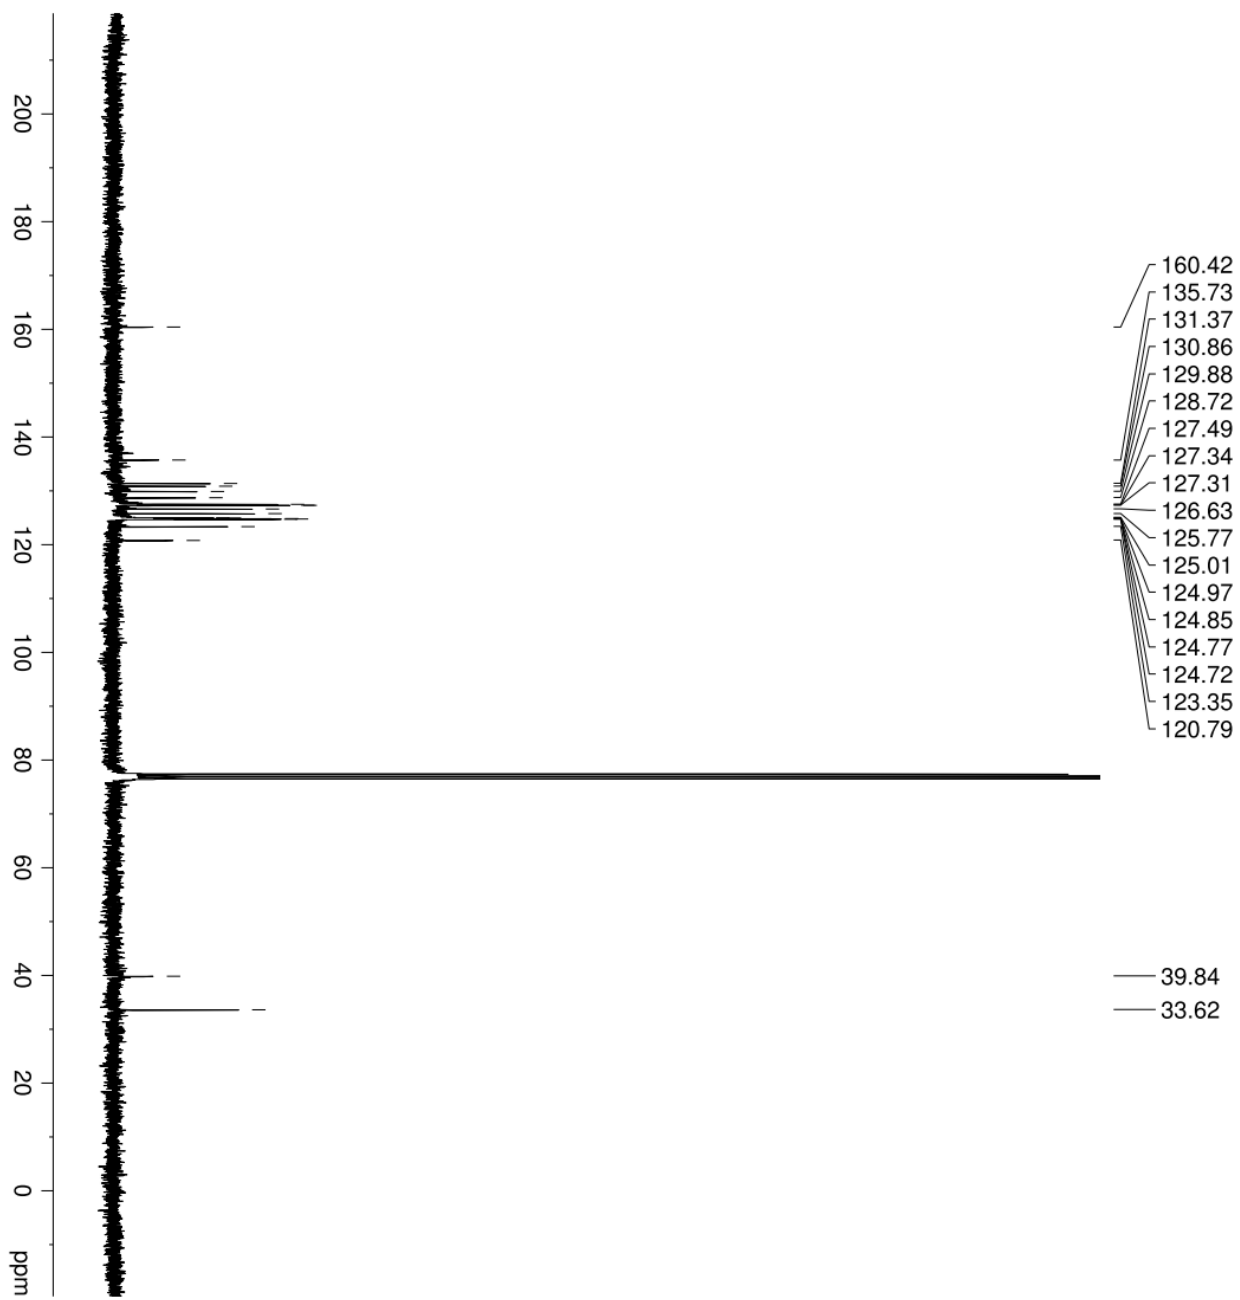

<sup>13</sup>C NMR spectrum (75 MHz, CDCl<sub>3</sub>) of compound 4.

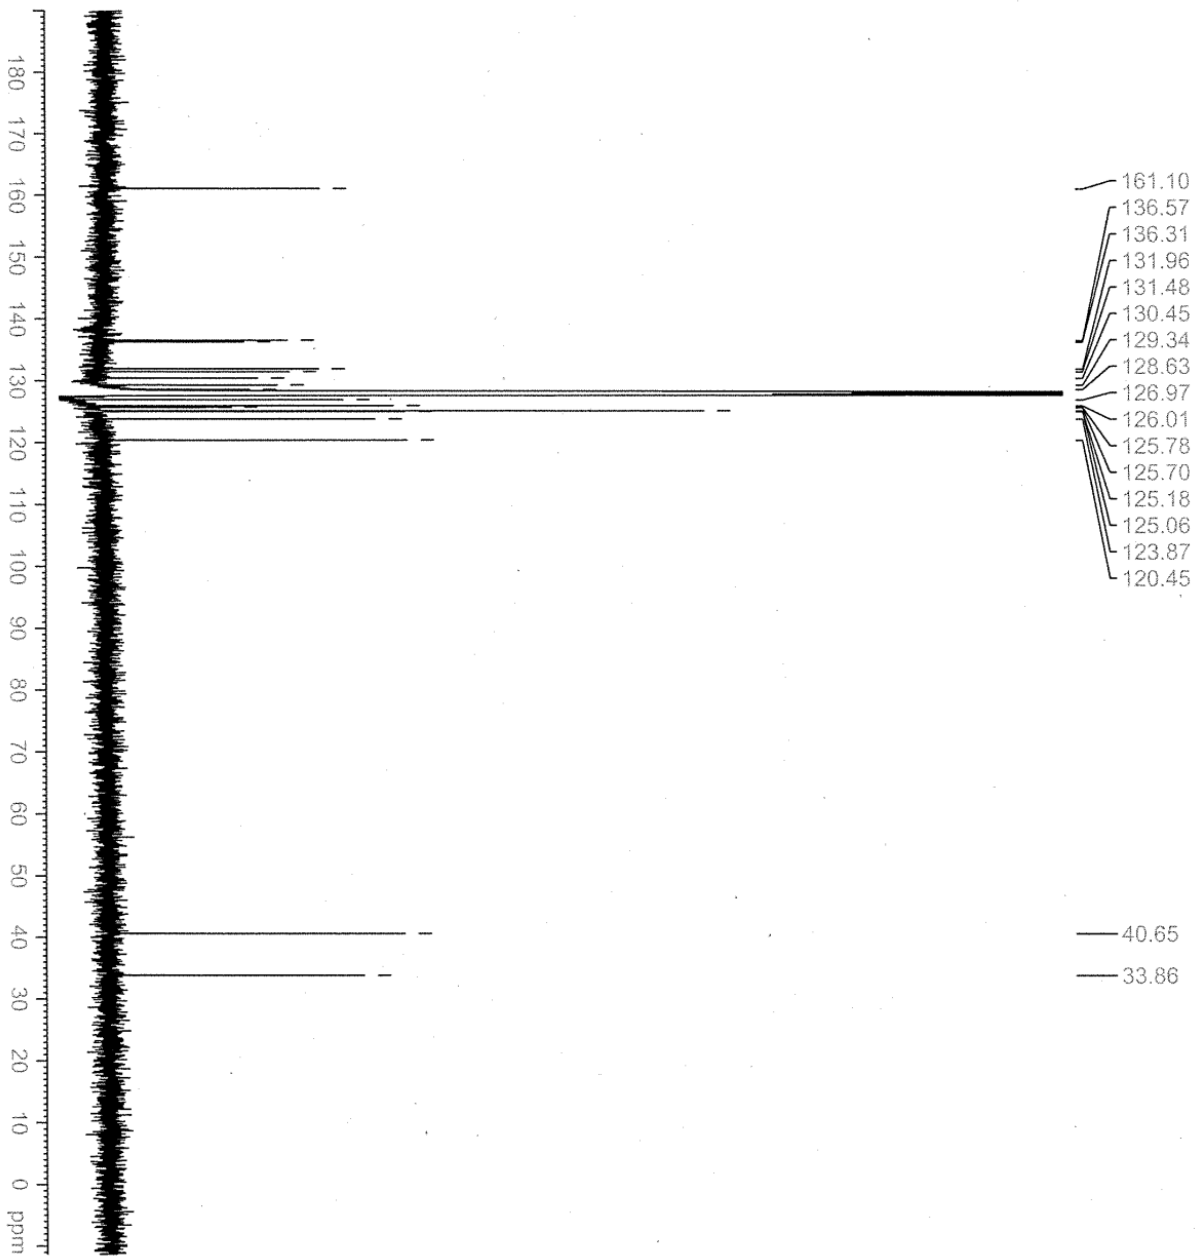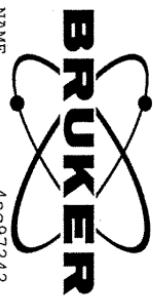

```

NAME          4sc97242
EXPNO         40
PROCNO        1
Date_         20150415
Time_         4.45
INSTRUM       5 mm PABBO BB-
PROBHD        zgpg30
PULPROG       65536
TD            C6D6
SOLVENT       3431
NS            4
DS            23980.814 Hz
SMH           0.365918 Hz
FIDRES        1.3664756 sec
AQ            46341
RG            20.850 usec
DM            9.00 usec
DE            299.5 K
TE            6.00000000 sec
D1            0.03000000 sec
D11           8
TD0           8

===== CHANNEL f1 =====
NUC1          13C
P1            6.65 usec
PL1           0.00 dB
SFO1         100.6227898 MHz

===== CHANNEL f2 =====
CPDPRG2      waltz16
NUC2          1H
PCPD2        116.00 usec
PL2           0.00 dB
PL12         21.25 dB
PL13         25.00 dB
SFO2         400.1316005 MHz
SI           32768
SF           100.6127493 MHz
WDW           EM
SSB           0
LB           1.00 Hz
GB           0
PC           1.40
  
```

<sup>13</sup>C NMR spectrum (100 MHz, C<sub>6</sub>D<sub>6</sub>) of compound 4.

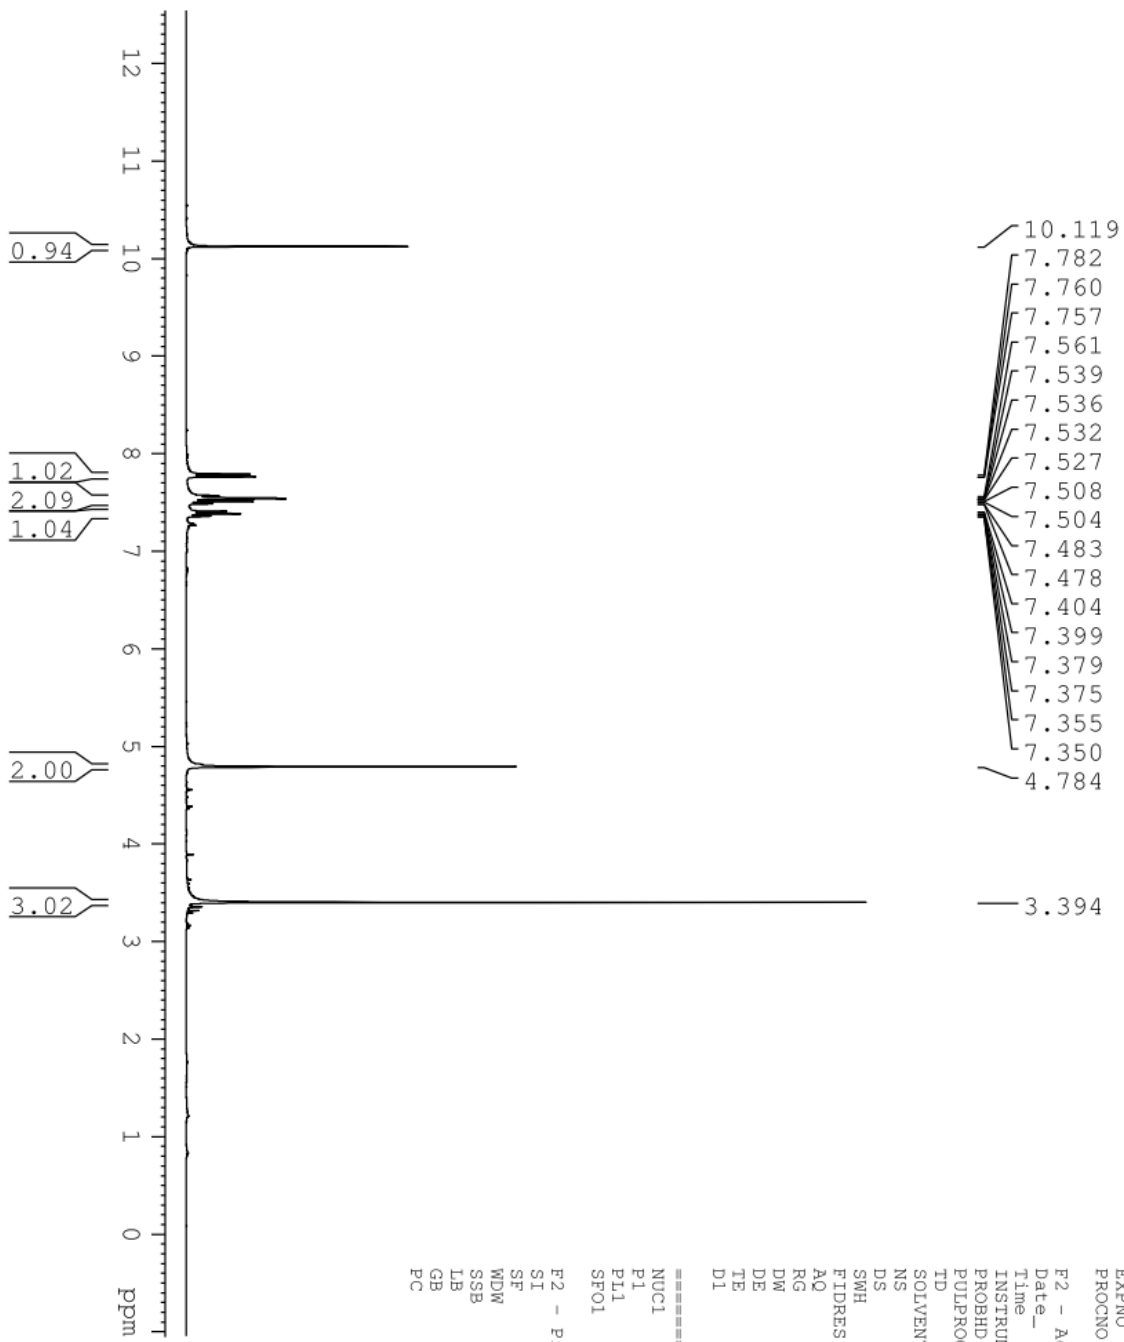

<sup>1</sup>H NMR spectrum (300 MHz, CDCl<sub>3</sub>) of aldehyde **5**.



MS51

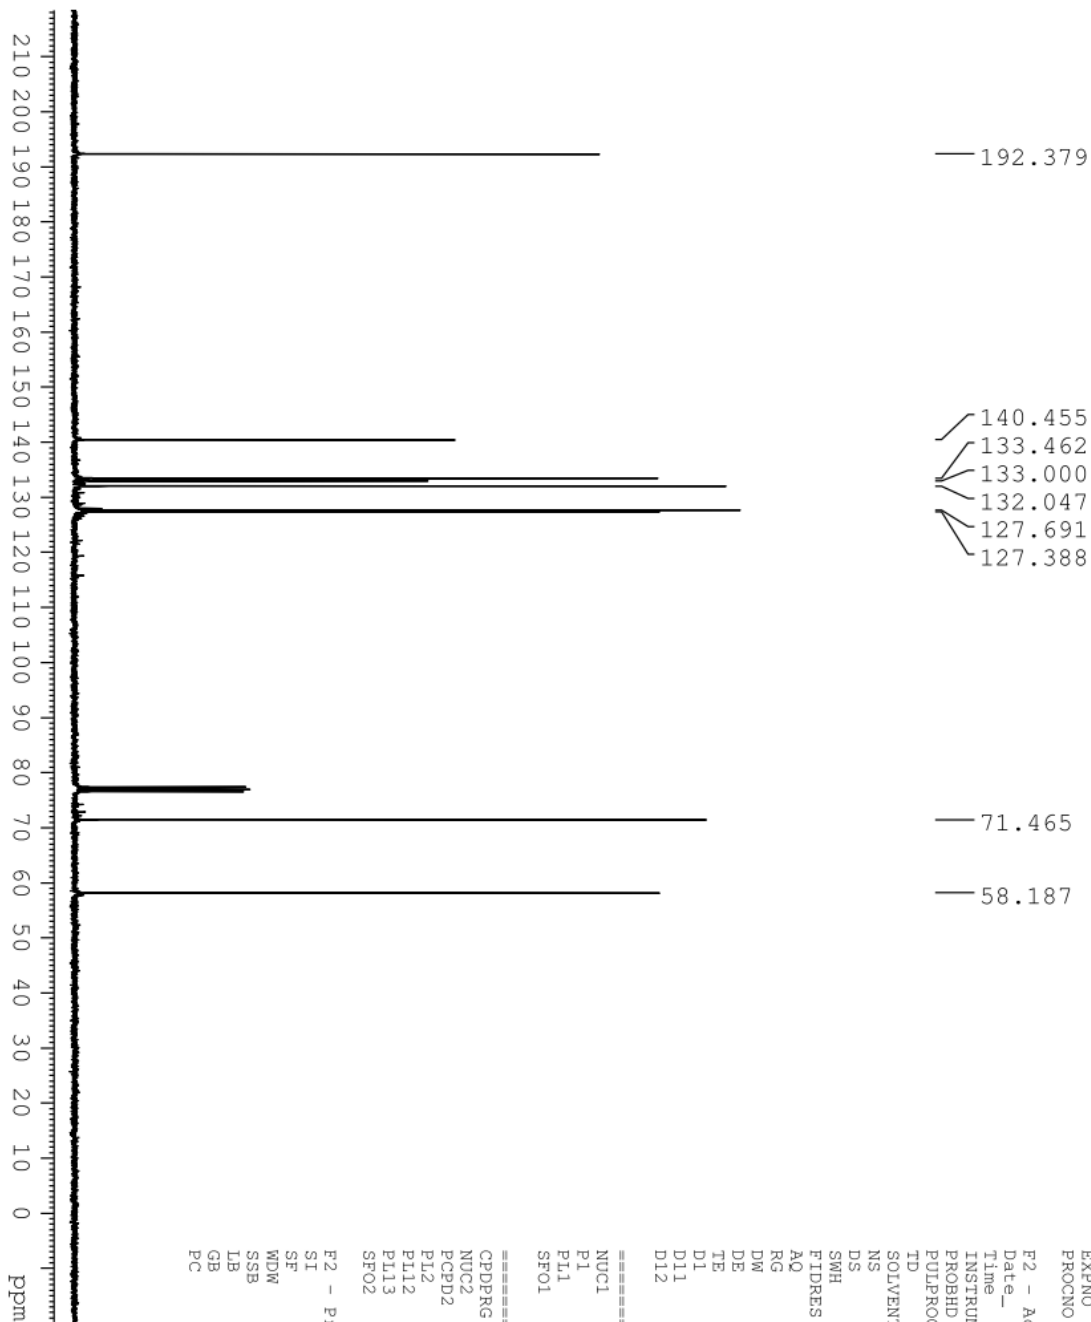

192.379

140.455  
133.462  
133.000  
132.047  
127.691  
127.388

71.465

58.187

```
Current Data Parameters
NAME          3ms65311c
EXPNO         1
PROCNO        1

F2 - Acquisition Parameters
Date_         20120322
Time          13.44
INSTRUM       spect
PROBHD        5 mm QNP 1H/1
PULPROG       zgpg30
TD            65536
SOLVENT       CDCl3
NS            122
DS            4
SWH           17985.611 Hz
FIDRES       0.274439 Hz
AQ           1.8219008 sec
RG           23170.5
DM           27.800 usec
DE           9.00 usec
TE           300.0 K
D1           6.00000000 sec
D11          0.03000000 sec
D12          0.00002000 sec

===== CHANNEL f1 =====
NUC1          13C
P1            6.70 usec
PL1           4.00 dB
SFO1          75.4752653 MHz

===== CHANNEL f2 =====
CPDPRG12     waltz16
NUC2          1H
PCPD2        115.00 usec
PL2           0 dB
PL12         23.00 dB
PL13         25.00 dB
SFO2         300.1312005 MHz

F2 - Processing parameters
SI            32768
SF           75.4677713 MHz
WDW           EM
SSB           0
LB           1.00 Hz
GB           0
PC           1.00
```

<sup>13</sup>C NMR spectrum (75 MHz, CDCl<sub>3</sub>) of aldehyde **5**.

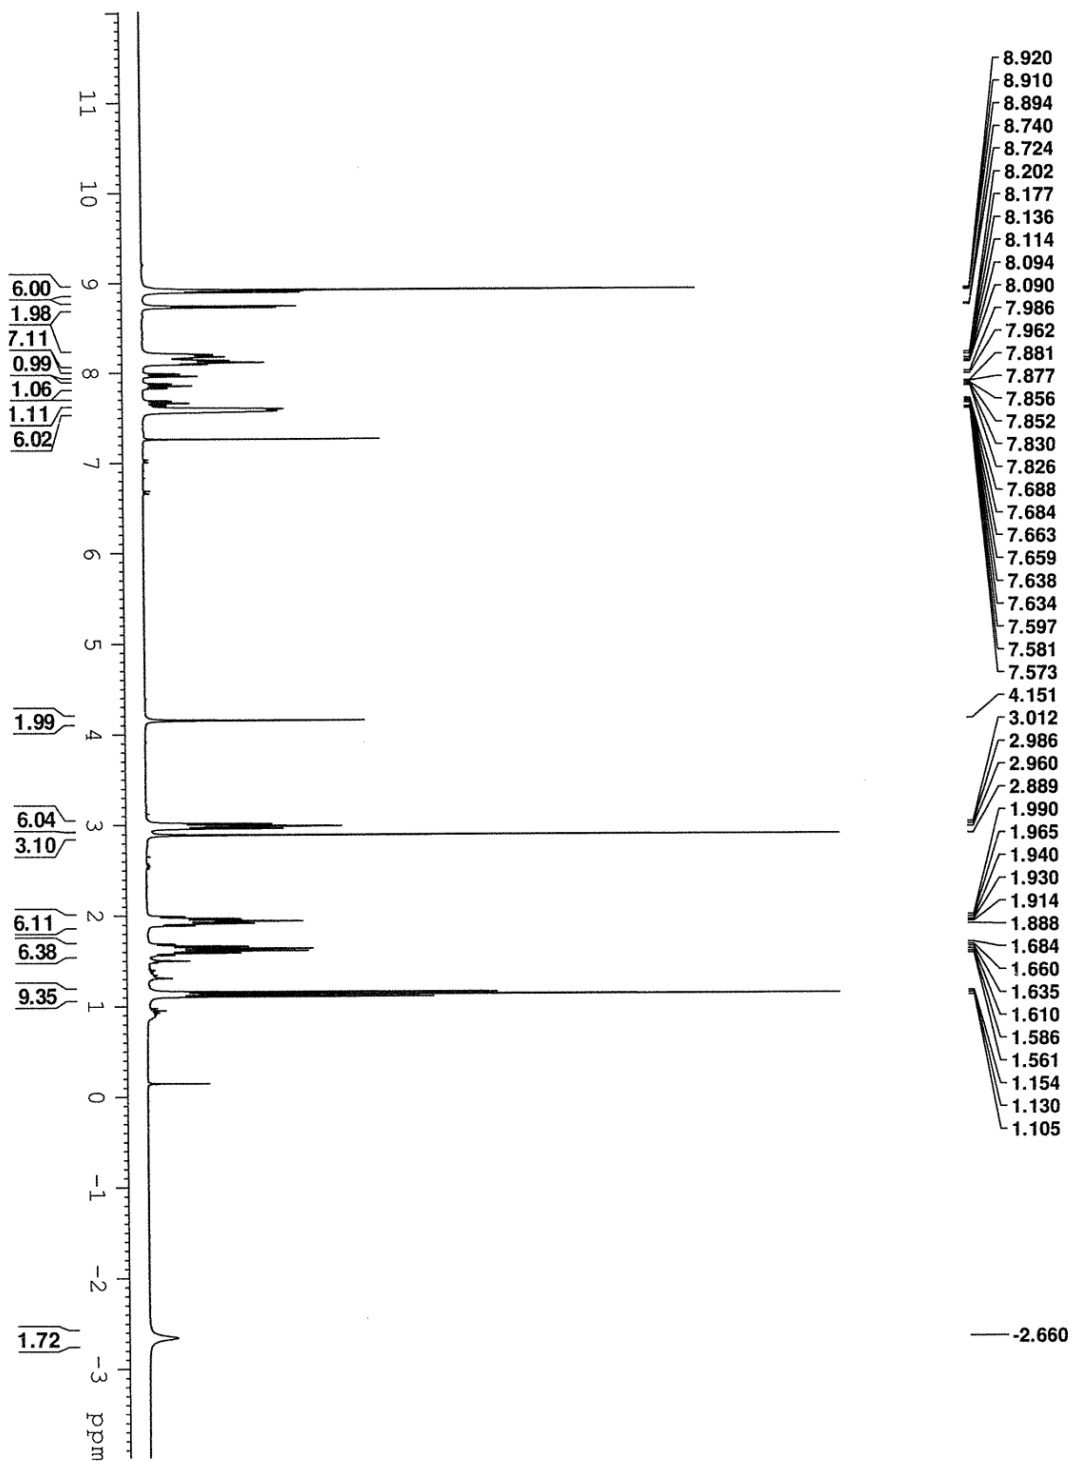

$^1\text{H}$  NMR spectrum (300 MHz,  $\text{CDCl}_3$ ) of porphyrin **7a**.

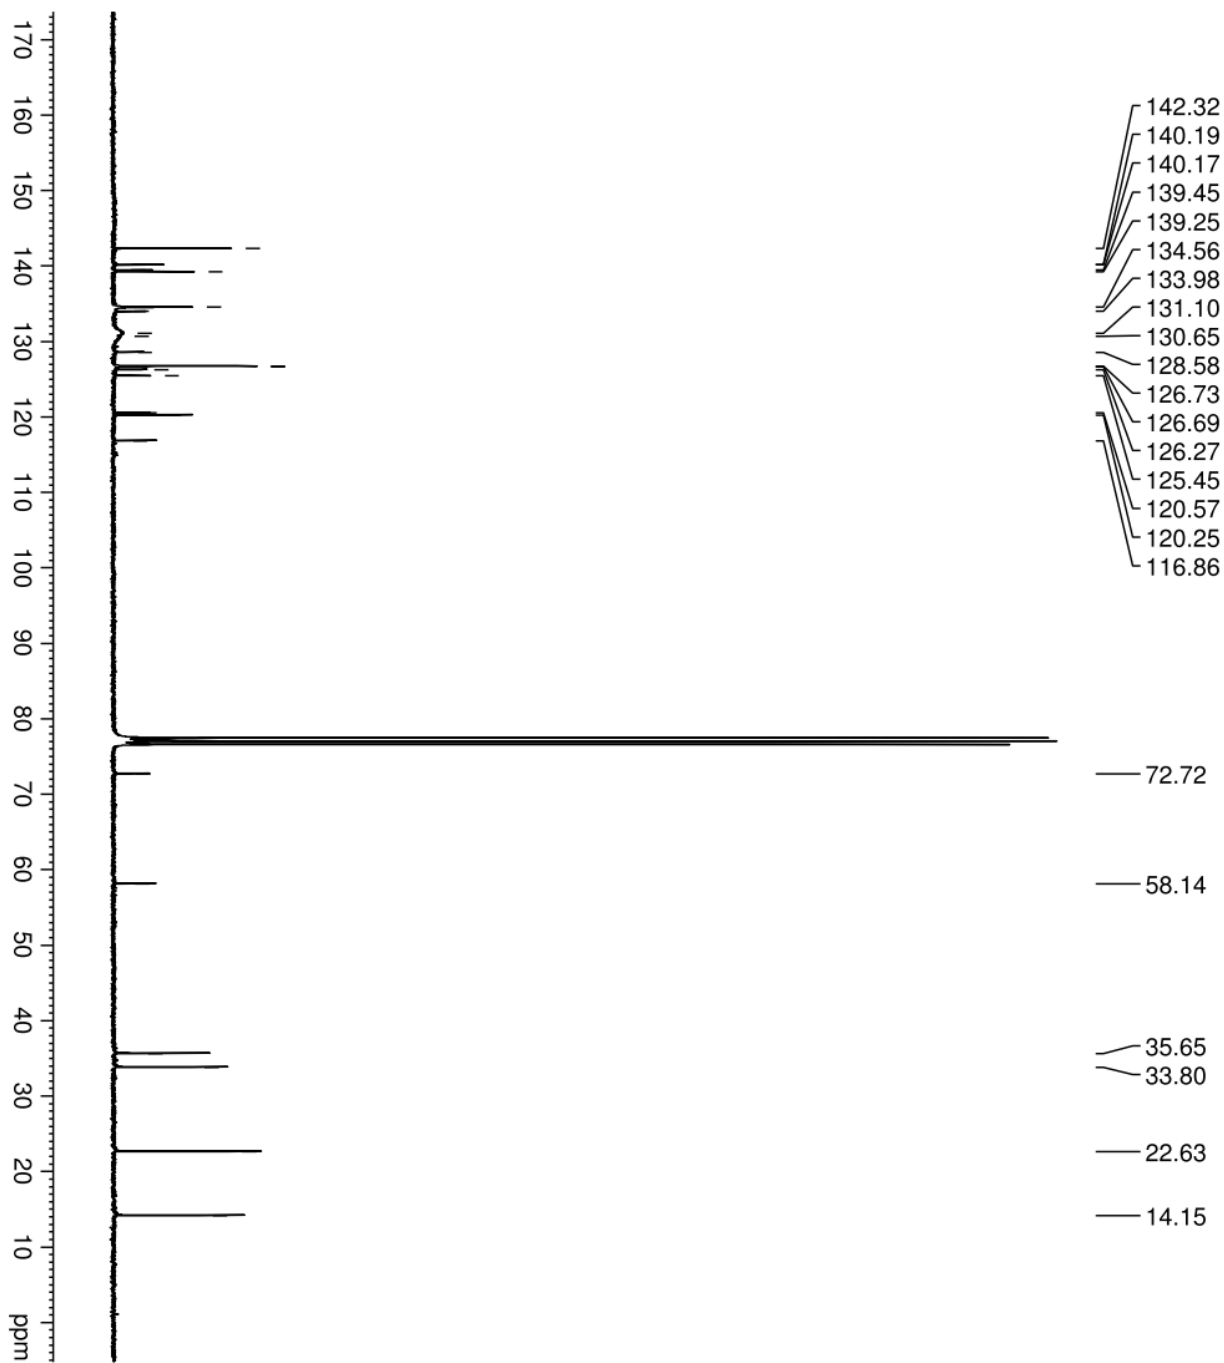

```

Current Data Parameters
NAME          3ms71672c
EXPNO         1
PROCNO        1

F2 - Acquisition Parameters
Date_         20130124
Time          8.11
INSTRUM      spect
PROBHD       5 mm QNP
PULPROG      zgpg30
TD           65536
SOLVENT      CDCl3
NS           6288
DS           4
SWH          17985.611 Hz
FIDRES      0.274439 Hz
AQ          1.8219008 sec
RG          20642.5
DE         27.800 usec
TE          300.0 K
D1          5.500000000 sec
D11         0.030000000 sec
D12         0.000020000 sec

===== CHANNEL f1 =====
NUC1         13C
P1           6.70 usec
PL1          4.00 dB
SFO1         75.4752653 MHz

===== CHANNEL f2 =====
CPDPRG12    waltz16
NUC2         1H
PCPD2       115.00 usec
PL2         0 dB
PL12        23.00 dB
PL13        25.00 dB
SFO2        300.1312005 MHz

F2 - Processing parameters
SI          32768
SF          75.4677536 MHz
WDW         EM
SSB         0
LB          1.00 Hz
GB          0
PC          0.70

```

$^{13}\text{C}$  NMR spectrum (75 MHz,  $\text{CDCl}_3$ ) of porphyrin **7a**.

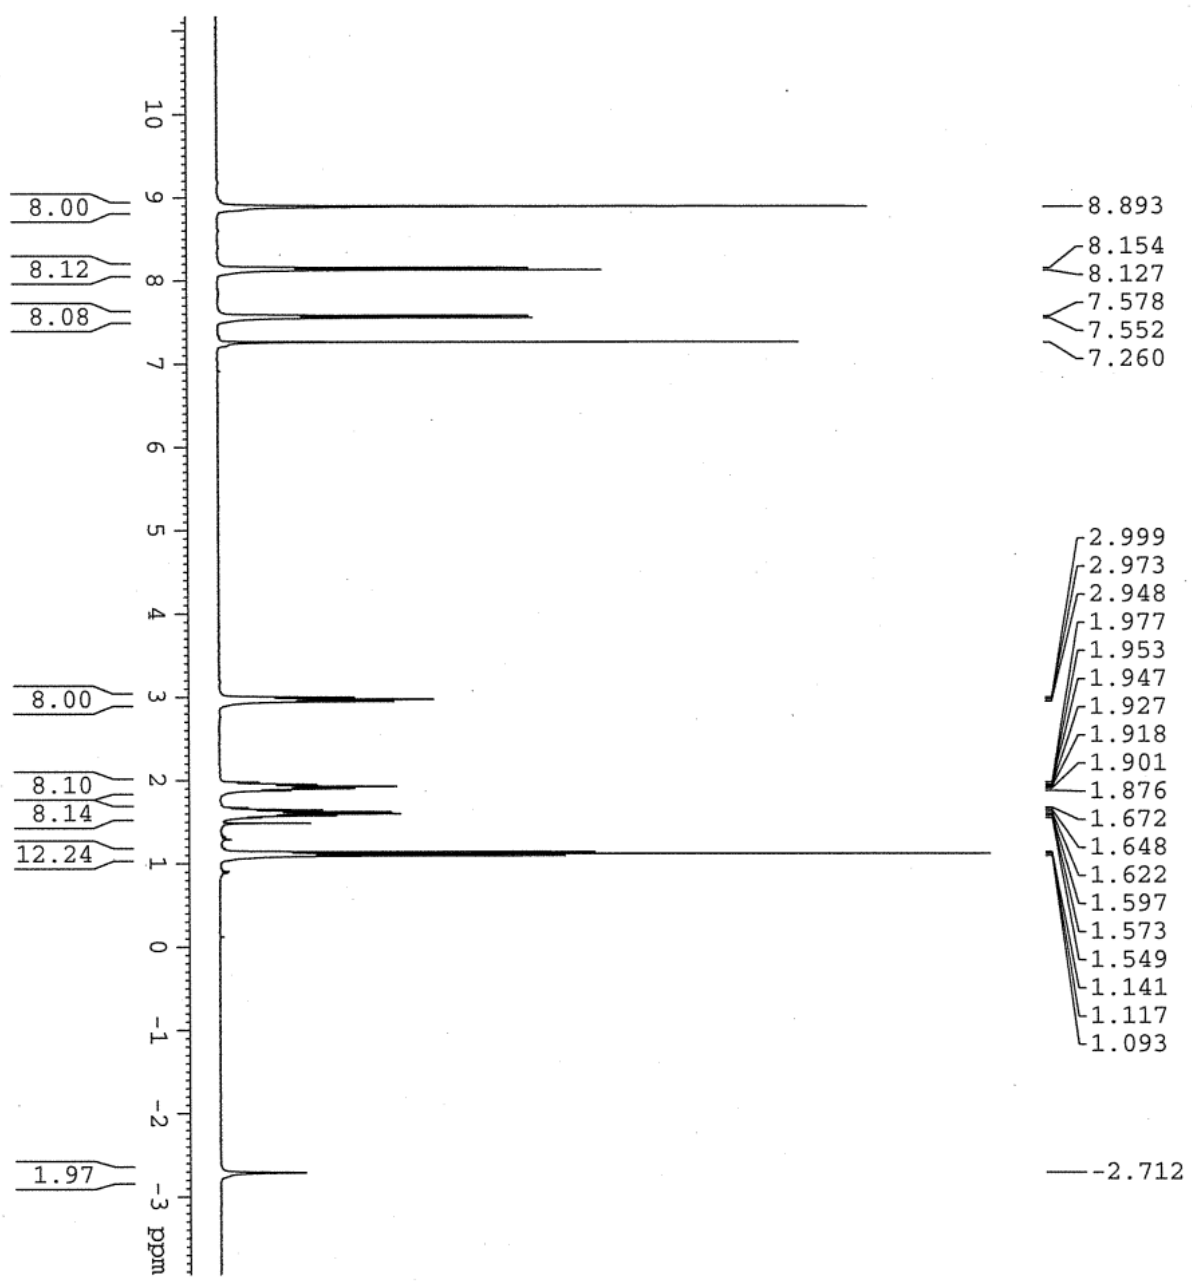

```

NAME          3ms77502h
EXPNO         1
PROCNO        1
Date_         20130925
Time          15.34
INSTRUM       5 mm QNP
PROBHD        spect
PULPROG       zg30
TD            65536
SOLVENT       CDCl3
NS            4
DS            2
SWH           6172.839 Hz
FIDRES        0.094190 Hz
AQ            5.3084660 sec
RG            574.7
DW            81.000 usec
DE            9.00 usec
TE            300.0 K
D1            2.00000000 sec

===== CHANNEL f1 =====
NUC1          1H
P1            10.60 usec
PL1           0.00 dB
SFO1          300.1318534 MHz
SI            32768
SF            300.1300061 MHz
WDW           EM
SSB           0
LB            0.30 Hz
GB            0
PC            0.70

```

<sup>1</sup>H NMR spectrum (300 MHz, CDCl<sub>3</sub>) of porphyrin **8**.

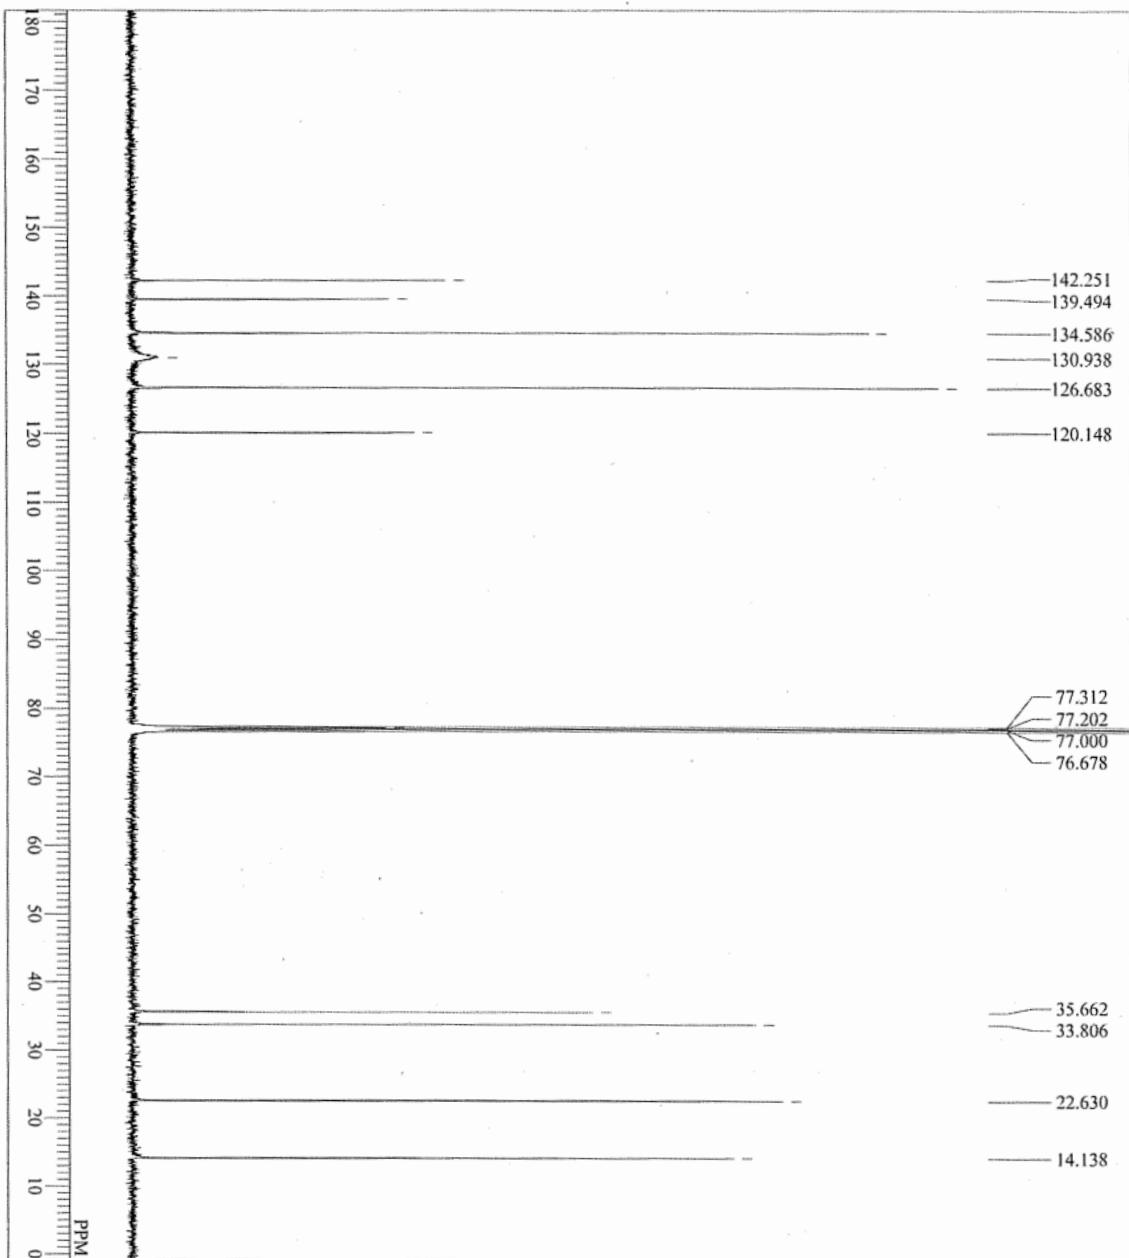

C:\WINNMR\981\Dat\sch43474\_1\BCM\_E1.als  
 #43474/SCHULZE/T\B\p\p\CDCl3/RT/CHP

DATIM Fri Sep 27 02:44:40 2013  
 EXMOD BCM  
 OBNUC 13C  
 OFR 100.50 MHz  
 OBSSET 123.00 KHz  
 OBFIN 14039.2 Hz  
 IRNUC 1H  
 IFR 400.05 MHz  
 IRSET 120.00 KHz  
 IRFIN 10600.0 Hz  
 FREQU 30303.0 Hz  
 POINT 32768  
 SAMPO 32768  
 DUMMY 1  
 TMES 3600  
 SCANS 3600  
 RESOL 0.92 Hz  
 PW1 4.3 us  
 PW2 10.0 us  
 PW3 10.0 us  
 P11 1.000 ms  
 P12 1.000 ms  
 P13 1.00 ms  
 ACQTM 1.081 sec  
 PD 6.000 sec  
 SLVNT CDCL3  
 CTEMP 23.2 c  
 RGAIN 30  
 BF 1.50 Hz  
 EXREF 77.00 ppm  
 TMSP 20899

<sup>13</sup>C NMR spectrum (100 MHz, CDCl<sub>3</sub>) of porphyrin **8**.

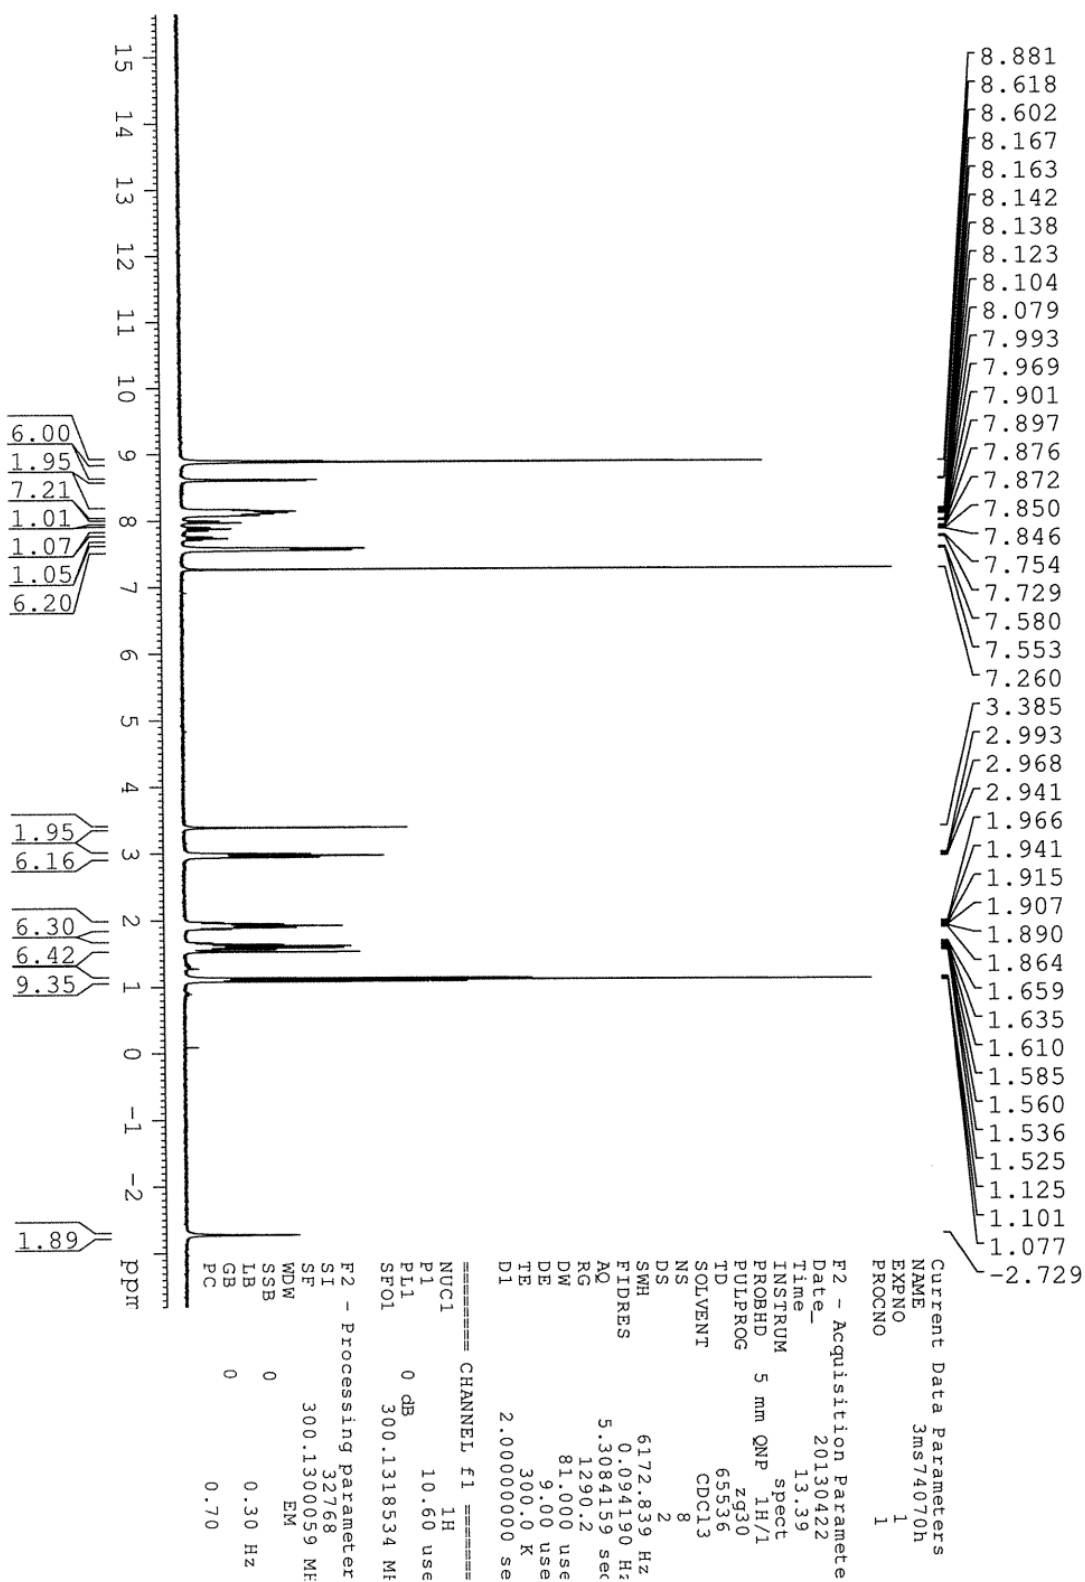

<sup>1</sup>H NMR spectrum (300 MHz, CDCl<sub>3</sub>) of porphyrin **9**.

MS96-2

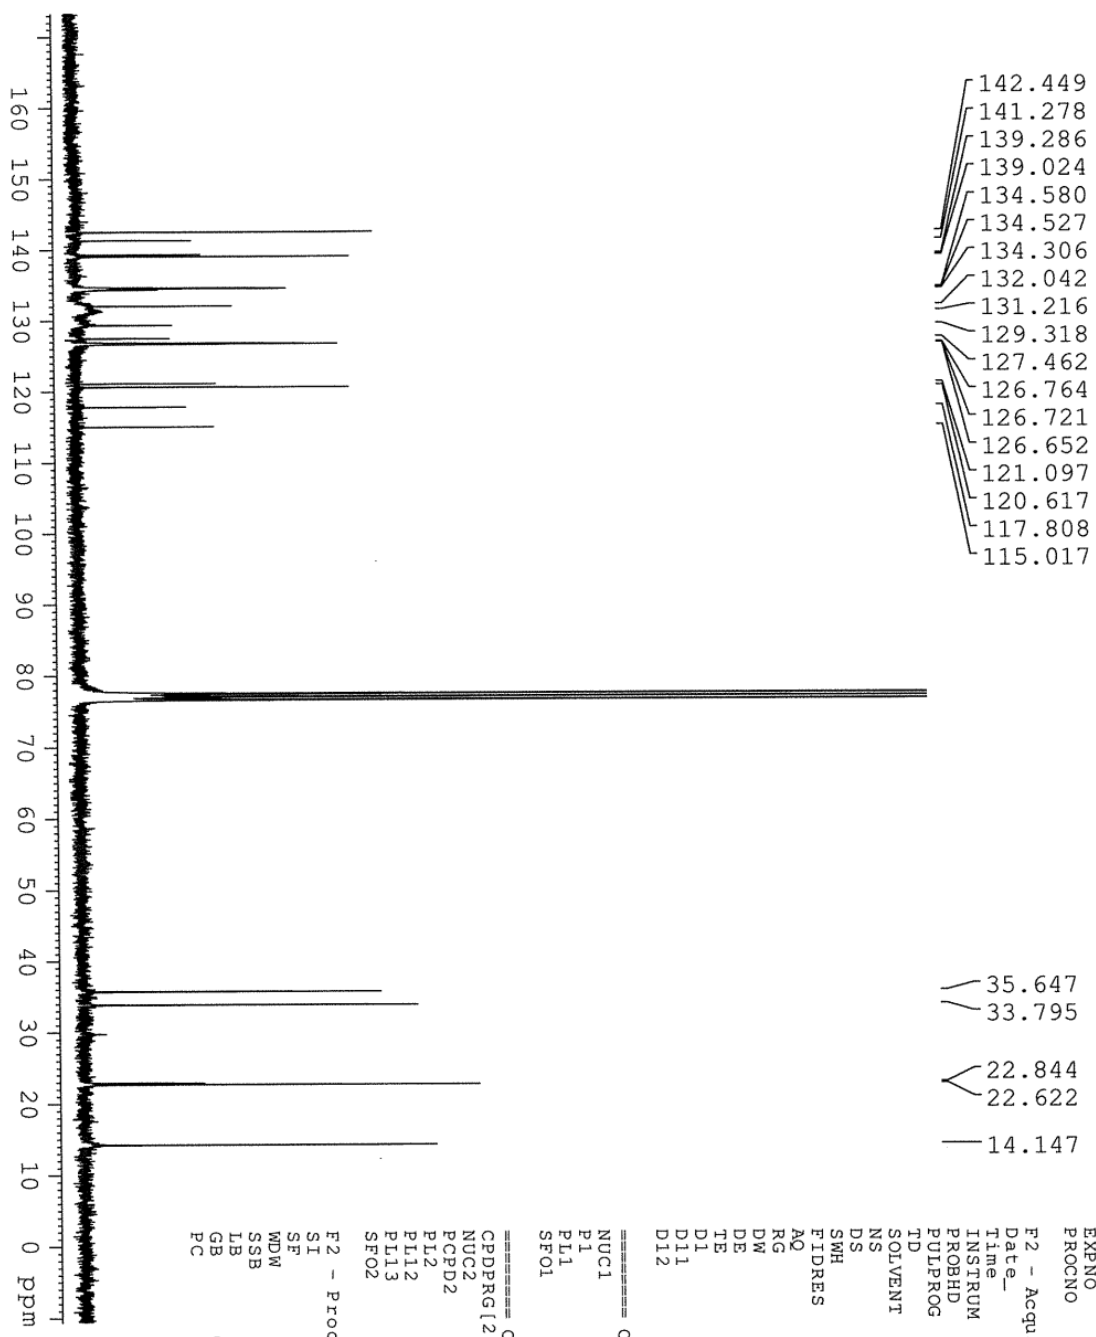

142.449  
141.278  
139.286  
139.024  
134.580  
134.527  
134.306  
132.042  
131.216  
129.318  
127.462  
126.764  
126.721  
126.652  
121.097  
120.617  
117.808  
115.017

35.647  
33.795  
22.844  
22.622  
14.147

```
Current Data Parameters
NAME          3ms71475c
EXPNO         1
PROCNO        1

F2 - Acquisition Parameter
Date_         20130117
Time          8.40
INSTRUM       spect
PROBHD        5 mm QNP 1H/1
PULPROG       zgpg30
TD            65536
SOLVENT       CDCl3
NS            6534
DS            4
SMH           17985.611 Hz
FIDRES        0.274439 Hz
AQ            1.8219008 sec
RG            20642.5
DW            27.800 usec
DE            9.00 usec
TE            300.0 K
D1            5.50000000 sec
D11           0.03000000 sec
D12           0.00002000 sec

===== CHANNEL f1 =====
NUC1          13C
P1            6.70 usec
PL1           4.00 dB
SFO1          75.4752653 MHz

===== CHANNEL f2 =====
CPDPRG12     waltz16
NUC2          1H
PCPD2        115.00 usec
P12           0 dB
PL12         23.00 dB
PL13         25.00 dB
SFO2         300.1312005 MHz

F2 - Processing Parameters
SI            32768
SF            75.4677530 MHz
WDW          EM
SSB           0
LB            1.00 Hz
GB            0
PC            0.70
```

<sup>13</sup>C NMR spectrum (75 MHz, CDCl<sub>3</sub>) of porphyrin 9.

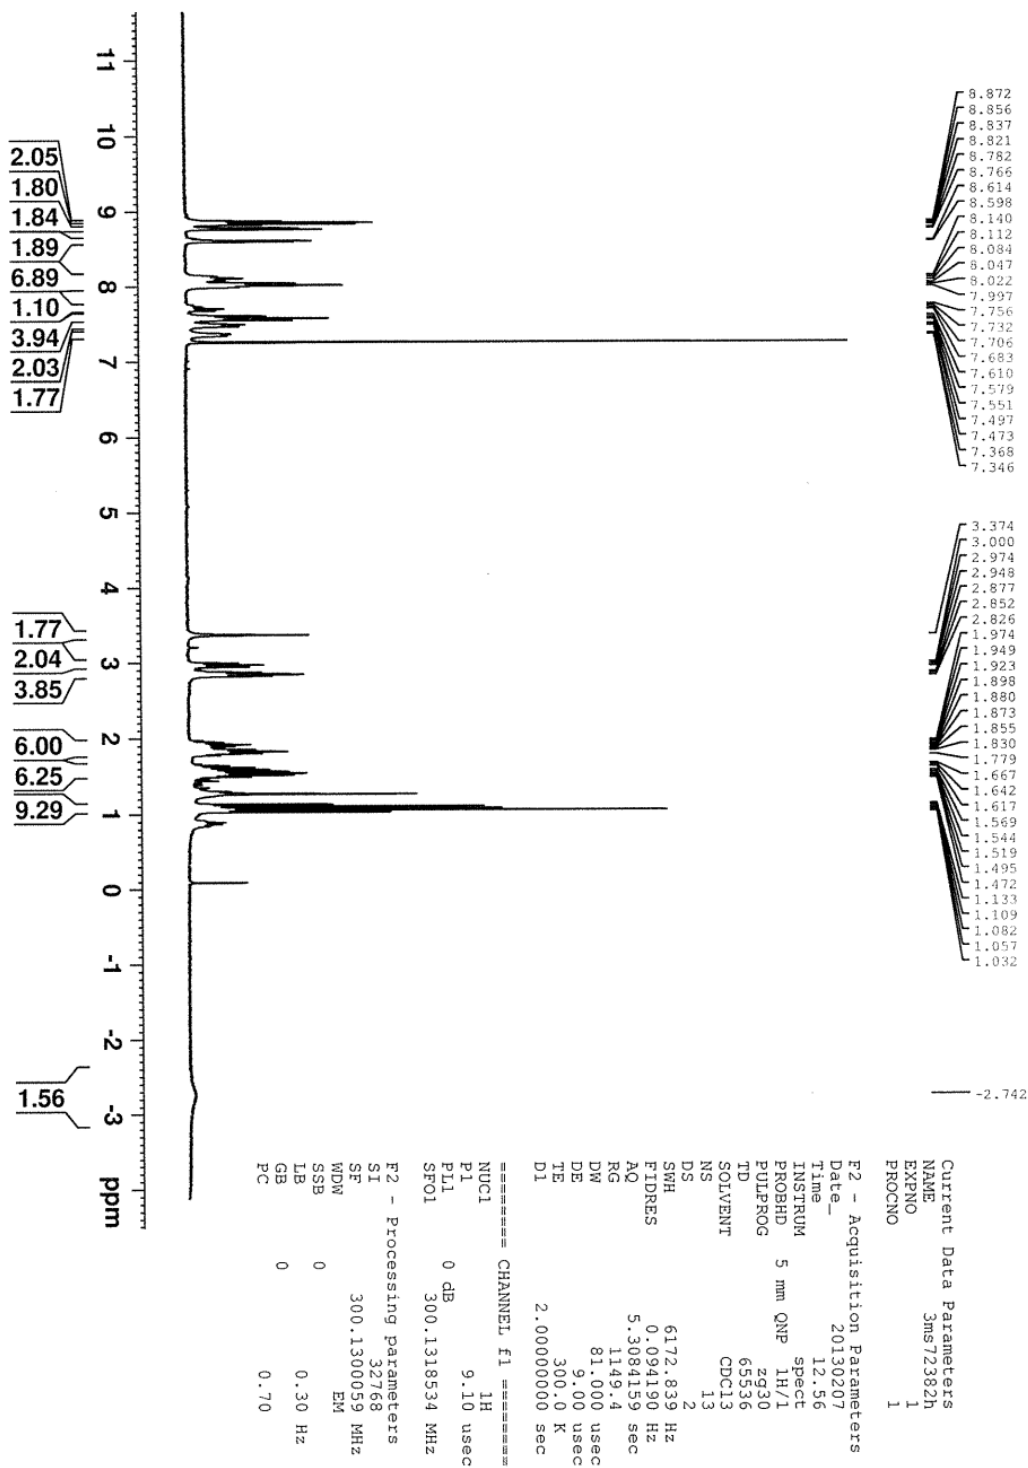

<sup>1</sup>H NMR spectrum (300 MHz, CDCl<sub>3</sub>) of porphyrin **10**.



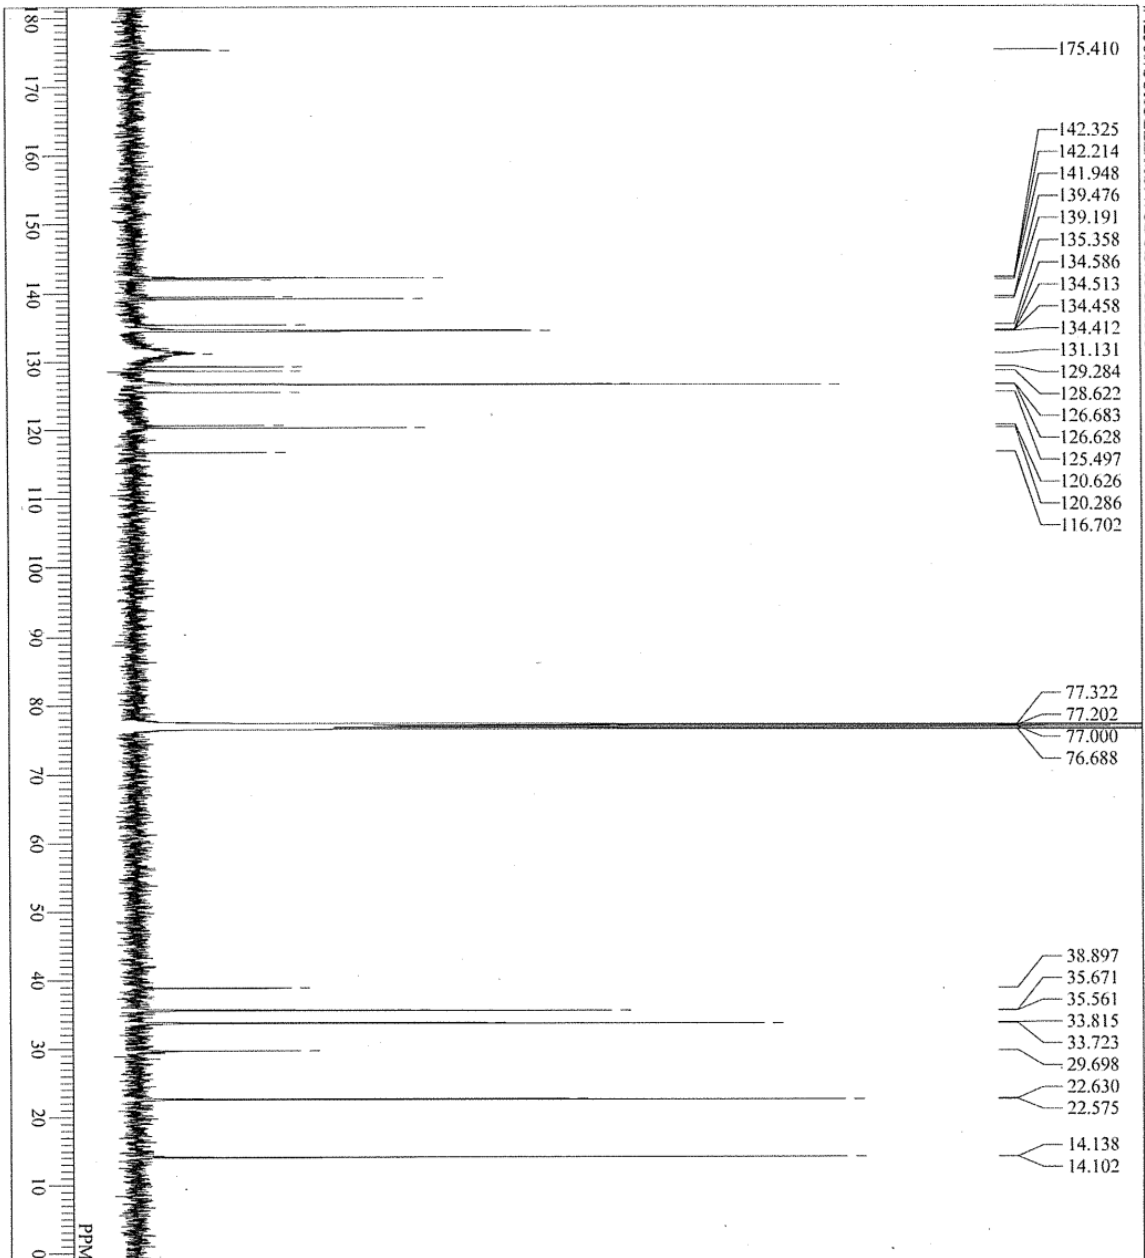

DATIM Tue Feb 12 11:44:50 2013  
 EXMOD BCM  
 OBNUC 13C  
 OFR 100.50 MHz  
 OBSET 123.00 KHz  
 OBFIN 14039.2 Hz  
 IRNUC 1H  
 IFR 400.05 MHz  
 IRSET 120.00 KHz  
 IRFIN 10600.0 Hz  
 FREQU 30303.0 Hz  
 POINT 32768  
 SAMPO 32768  
 DUMMY 1  
 TIMES 10000  
 SCANS 4344  
 RESOL 0.92 Hz  
 PW1 5.3 us  
 PW2 10.0 us  
 PW3 10.0 us  
 P11 1.000 ms  
 P12 1.000 ms  
 P13 1.00 ms  
 ACQTM 1.081 sec  
 PD 6.000 sec  
 SLVNT CDCL3  
 CTEMP 22.1 c  
 RGAIN 29  
 BF 1.50 Hz  
 EXREF 77.00 ppm  
 TMSP 20901

<sup>13</sup>C NMR spectrum (100 MHz, CDCl<sub>3</sub>) of porphyrin 10.

## 2D NMR spectra of compound 4

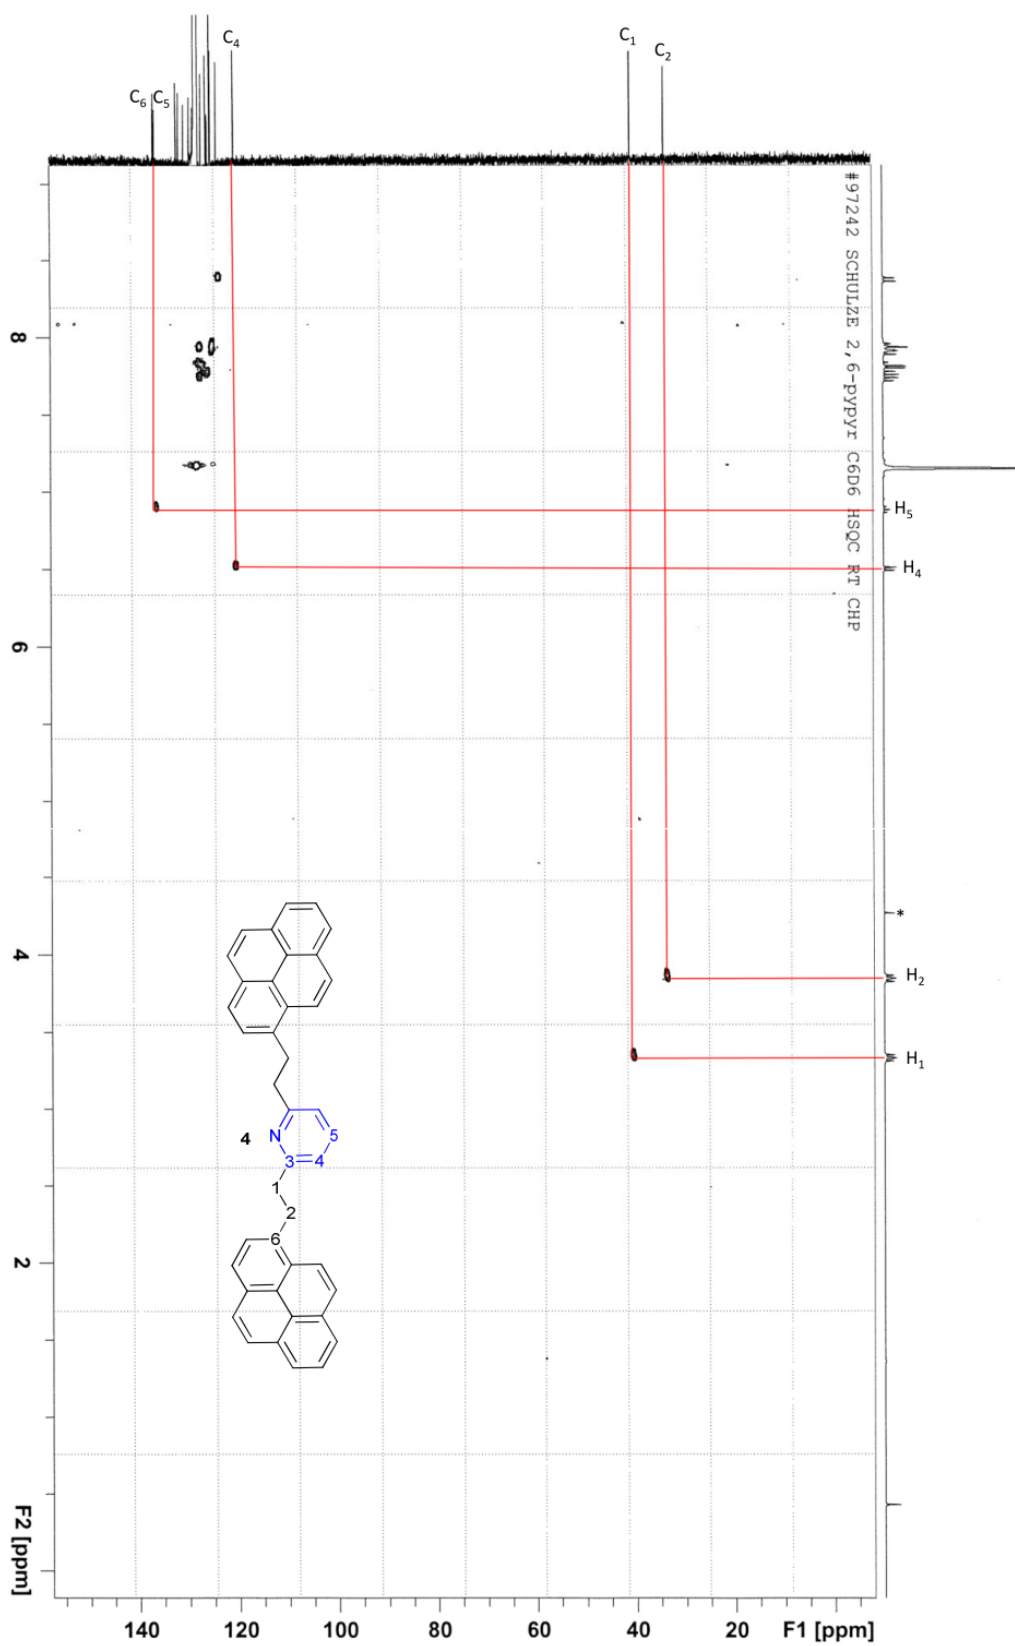

HSQC spectrum (400 MHz,  $\text{C}_6\text{D}_6$ ) of compound 4.

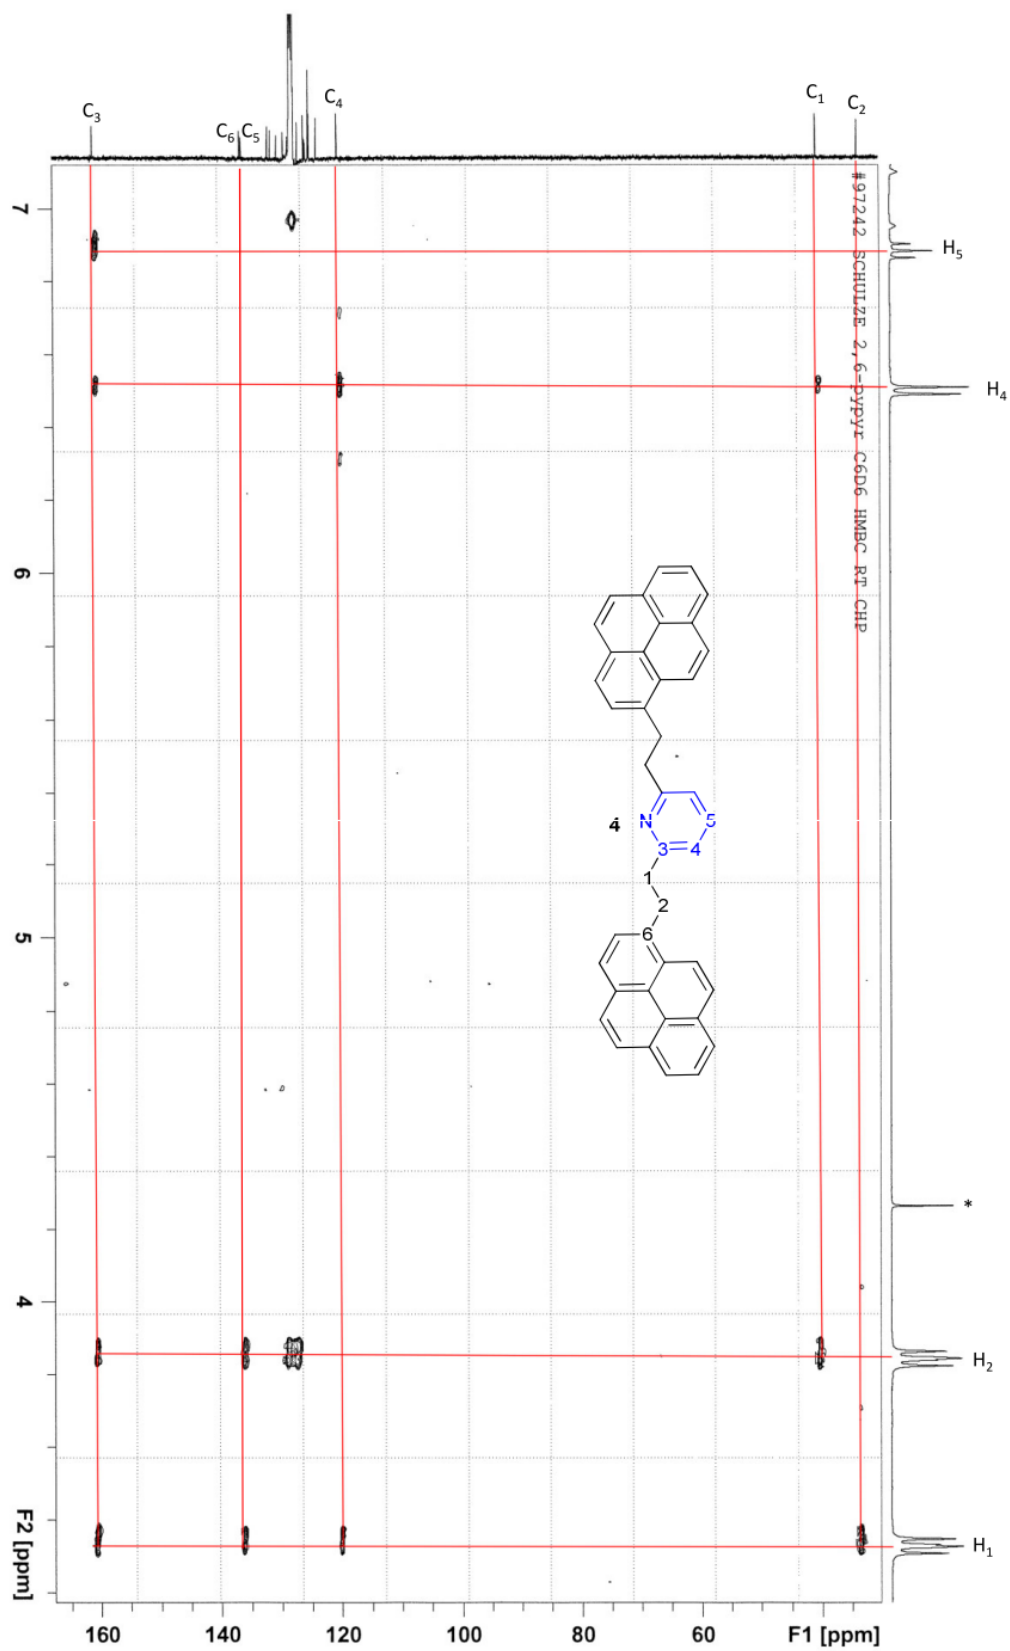

HMBC spectrum (400 MHz, C<sub>6</sub>D<sub>6</sub>) of compound 4.

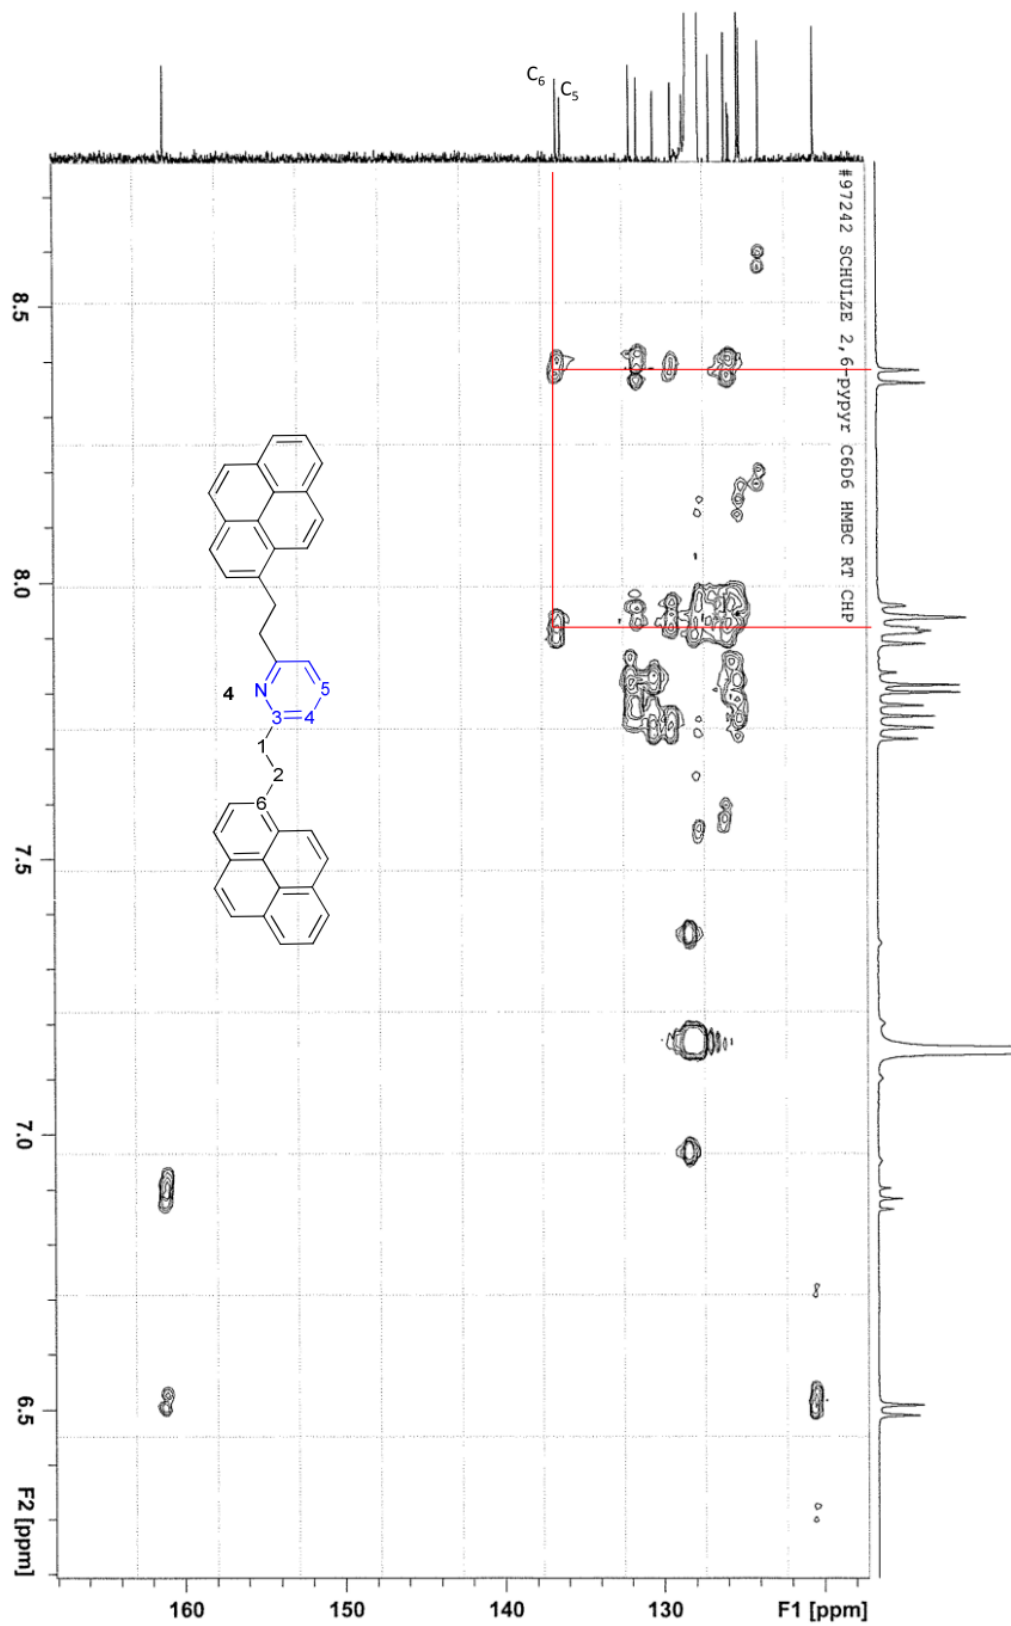

HMBC spectrum (400 MHz, C<sub>6</sub>D<sub>6</sub>) of compound 4.

## NMR Titration Measurements

Nonlinear curve fitting for the determination of association constants was performed with HypNMR 2008 software.<sup>1</sup> All titrations were analyzed using 400 MHz NMR spectrometers.

### Study 1. NMR dilution titration of phenylacetic acid

Phenylacetic acid (PAA) was used as a reference carboxylic acid. In C<sub>6</sub>D<sub>6</sub>, no change in chemical shifts was observed by <sup>1</sup>H NMR spectroscopy over a concentration range of 0.15 M to 1 x 10<sup>-5</sup> M.<sup>2,3</sup>

**Titration 1.** PAA (28.6 mg, 0.210 mmol) was dissolved in 1.40 mL C<sub>6</sub>D<sub>6</sub> to give solution (a) (150 mM; Figure S1). From this solution, 0.700 mL were removed and diluted with 0.700 mL C<sub>6</sub>D<sub>6</sub> to obtain solution (b) (75 mM). This procedure was repeated two times to obtain solutions with concentrations of 37.5 mM (c) and 18.75 mM (d). From solution (d), 0.374 mL were removed and diluted with 1.03 mL C<sub>6</sub>D<sub>6</sub> to obtain a solution (e) (5.0 mM). From solution (e), 0.154 mL were removed and diluted with 0.62 mL C<sub>6</sub>D<sub>6</sub> to obtain solution (f) (1.0 mM). From solution (f), 70 μL were removed and diluted with 0.63 mL C<sub>6</sub>D<sub>6</sub> to give solution (g) (0.1 mM).

**Titration 2.** PAA (2.45 mg, 0.0180 mmol) was dissolved in 1.80 mL C<sub>6</sub>D<sub>6</sub> to give solution (a) (10 mM; Figure S2). From this solution, 0.525 mL were removed and diluted with 0.175 mL C<sub>6</sub>D<sub>6</sub> to obtain solution (b) (7.50 mM). From solution (a), 0.600 mL were removed and diluted with 0.600 mL C<sub>6</sub>D<sub>6</sub> to obtain solution (c) (5.00 mM). This procedure was repeated three times to obtain solutions with the concentrations of 2.50 mM (d), 1.25 mM (e), and 0.625 mM (f). From solution (f), 0.240 mL were removed and diluted with 1.26 mL C<sub>6</sub>D<sub>6</sub> to obtain solution (g) (0.1 mM). From solution (f), 22.4 μL were removed and diluted with 1.38 mL C<sub>6</sub>D<sub>6</sub> to obtain solution (h) (0.01 mM).

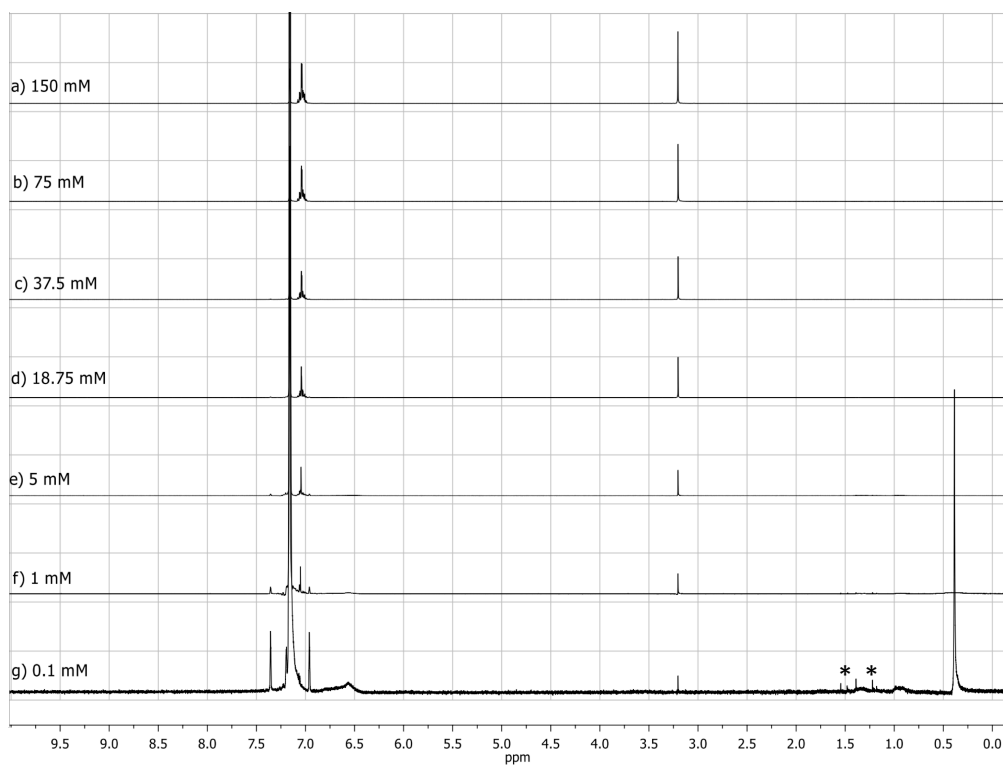

**Figure S1.**  $^1\text{H}$  NMR spectra from PAA Titration 1 (solutions a–g), at concentrations ranging from 150 mM to 0.1 mM (\* = solvent impurities).

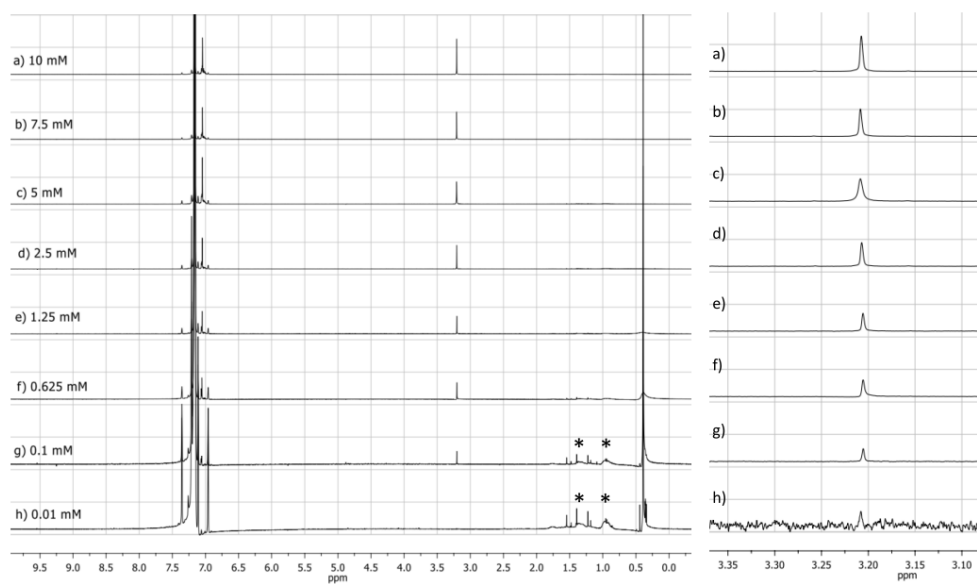

**Figure S2.**  $^1\text{H}$  NMR spectra of PAA Titration 1 (solutions a–h) at concentrations ranging from 10 mM to 0.01 mM (\* = solvent impurities).

## Study 2. NMR titration of phenylacetic acid and pyridine

A solution of pyridine (200 mM) was prepared by dissolving pyridine (16.2  $\mu\text{L}$ , 15.8 mg, 0.200 mmol) in  $\text{C}_6\text{D}_6$  (1.00 mL). From this solution, 0.450 mL were removed and diluted with 4.05 mL  $\text{C}_6\text{D}_6$  to obtain a solution of pyridine with a concentration of 20 mM in deuterated benzene.

Next, a solution of PAA (10 mM) was prepared by dissolving PAA (5.45 mg, 40.0  $\mu\text{mol}$ ) into 4.00 mL  $\text{C}_6\text{H}_6$ . From this solution, 0.175 mL was removed, the solvent evaporated, and the resulting solid dried *in vacuo*. This procedure was repeated ten times, to provide eleven samples of PAA (0.24 mg, 1.8  $\mu\text{mol}$ ).

Finally, each sample of PAA was dissolved into a volume of the pyridine solution (20 mM) and pure  $\text{C}_6\text{D}_6$  to obtain the following mixtures:

a) PAA (2.5 mM) / pyridine (2.5 mM)

(0.24 mg PAA + 87.5  $\mu\text{L}$  pyridine solution (20 mM) + 0.613 mL  $\text{C}_6\text{D}_6$ )

b) PAA (2.5 mM) / pyridine (4.0 mM)

(0.24 mg PAA + 0.140 mL pyridine solution (20 mM) + 0.560 mL  $\text{C}_6\text{D}_6$ )

c) PAA (2.5 mM) / pyridine (6.0 mM)

(0.24 mg PAA + 0.210 mL pyridine solution (20 mM) + 0.490 mL  $\text{C}_6\text{D}_6$ )

d) PAA (2.5 mM) / pyridine (8.0 mM)

(0.24 mg PAA + 0.280 mL pyridine solution (20 mM) + 0.420 mL  $\text{C}_6\text{D}_6$ )

e) PAA (2.5 mM) / pyridine (10 mM)

(0.24 mg PAA + 0.350 mL pyridine solution (20 mM) + 0.350 mL  $\text{C}_6\text{D}_6$ )

f) PAA (2.5 mM) / pyridine (12 mM)

(0.24 mg PAA + 0.420 mL pyridine solution (20 mM) + 0.280 mL  $\text{C}_6\text{D}_6$ )

g) PAA (2.5 mM) / pyridine (14 mM)

(0.24 mg PAA + 0.490 mL pyridine solution (20 mM) + 0.210 mL  $\text{C}_6\text{D}_6$ )

h) PAA (2.5 mM) / pyridine (16 mM)

(0.24 mg PAA + 0.560 mL pyridine solution (20 mM) + 0.140 mL  $\text{C}_6\text{D}_6$ )

i) PAA (2.5 mM) / pyridine (18 mM)

(0.24 mg PAA + 0.630 mL pyridine solution (20 mM) + 70.0  $\mu\text{L}$   $\text{C}_6\text{D}_6$ )

j) PAA (2.5 mM) / pyridine (20 mM)  
(0.24 mg PAA + 0.700 mL pyridine solution (20 mM))

All solutions were aged for 24 h at rt in the dark prior to recording a  $^1\text{H}$  NMR spectrum for each sample (Figure S3).

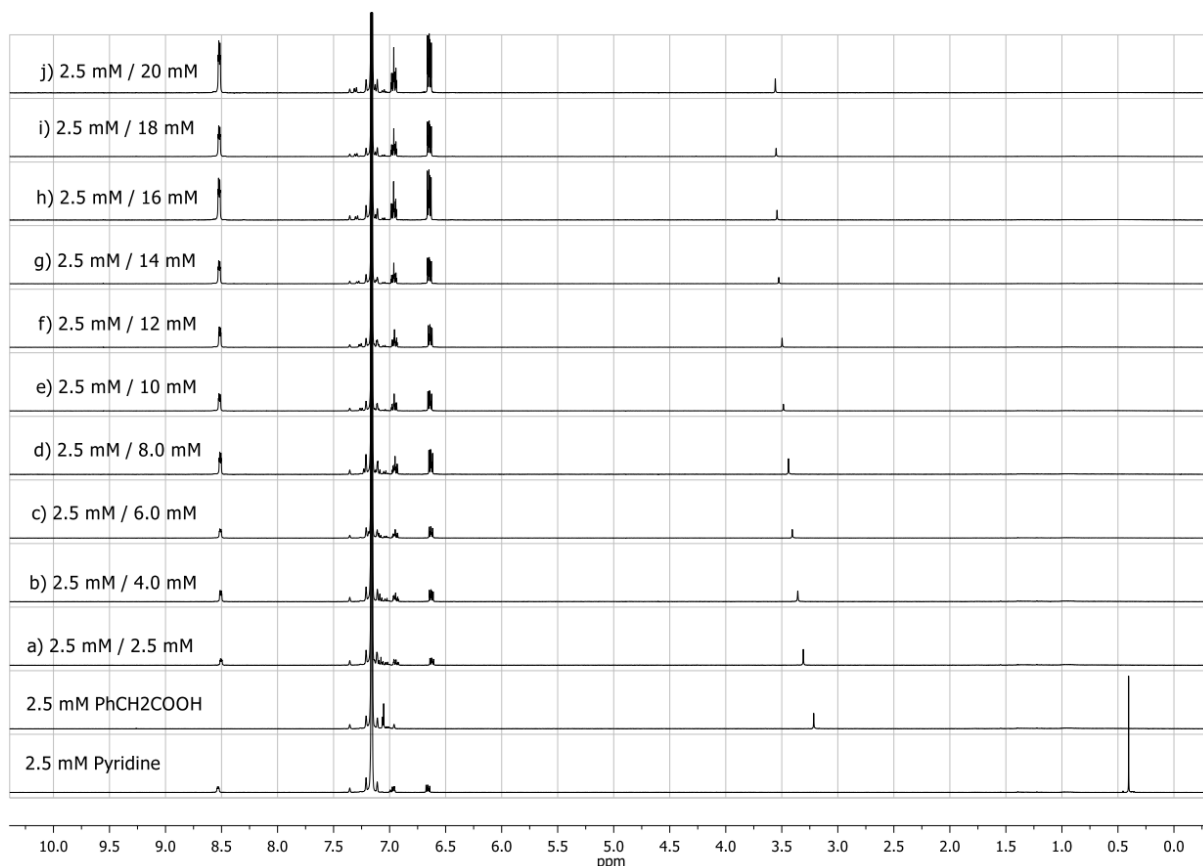

**Figure S3.**  $^1\text{H}$  NMR spectra from the NMR titration of PAA (constant 2.5 mM) with increasing amounts of pyridine.

Addition of increasing amounts of pyridine (S) to the solution of PAA (2.5 mM; R) resulted in a shift for the signal of the methylene protons (Figure S4). Fitting this data,  $K_{\text{assoc}}$  (SR) of  $123 \pm 12 \text{ M}^{-1}$  (log 2.09) was calculated for a 1:1 complex of PAA (R) and pyridine (S).<sup>4</sup>



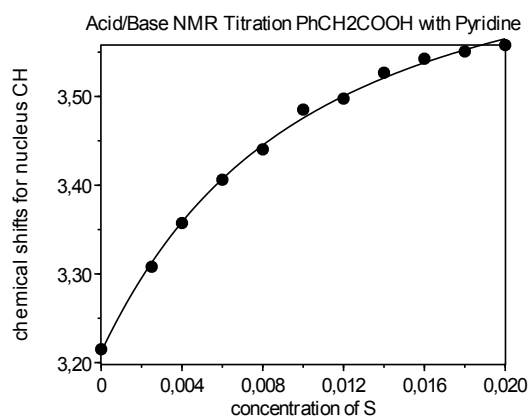

**Figure S4.** Binding isotherm for the NMR titration of PAA (2.5 mM) with pyridine (S) fit to a 1:1 binding model.

HypNMR2008

Refinement concluded at 15:38:49 on 28.02.2015

Project title: Acid/Base NMR Titration PhCH<sub>2</sub>COOH with Pyridine

Converged in 4 iterations with sigma = 5,751117

|                | value  | standard deviation | Comments |
|----------------|--------|--------------------|----------|
| 1 log beta(SR) | 2.0877 | 0.0427             | 2.09(4)  |

## Discussion

As described in **Study 1**, dimerization of PAA was not observed in C<sub>6</sub>D<sub>6</sub> based on <sup>1</sup>H NMR experiments, and it was therefore not necessary to consider  $K_{\text{dim}}$  of PAA in calculations performed to determine  $K_{\text{assoc}}$  for PAA and pyridine. Based on partition studies, however, Yamada et al. have reported  $K_{\text{dim}} = 48 \text{ M}^{-1}$  for PAA in benzene.<sup>3</sup> An additional analysis was therefore done, considering  $K_{\text{dim}} = 48 \text{ M}^{-1}$  and a reasonable value of 3.20 ppm for monomeric PAA, which gave  $K_{\text{assoc}} = 151 \pm 15$ .<sup>4</sup> Thus, dimerization of PAA might have a slight impact on the final  $K_{\text{assoc}}$  value, but all conclusions would remain identical.

### Study 3. NMR dilution titration of model compound 4

To investigate self-association of **4**, a solution of model compound **4** (10 mM; 6.43 mg, 0.0120 mmol) was prepared in deuterated benzene (1.2 mL) solution (a). From this solution, 0.6 mL was removed and diluted with 0.6 mL C<sub>6</sub>D<sub>6</sub> to obtain solution (b) (5.0 mM). This procedure was repeated three times, to give solutions with concentrations of 2.5, 1.25, and 0.625 mM (c–e, respectively). From solution (e), 0.24 mL was removed and diluted with 1.26 mL C<sub>6</sub>D<sub>6</sub> to obtain solution (f) (0.1 mM). A <sup>1</sup>H NMR spectrum was recorded for solutions a–f after aging for 24 h at rt in the dark and these are depicted in Figure S5. No evidence for self-association was found.<sup>5</sup>

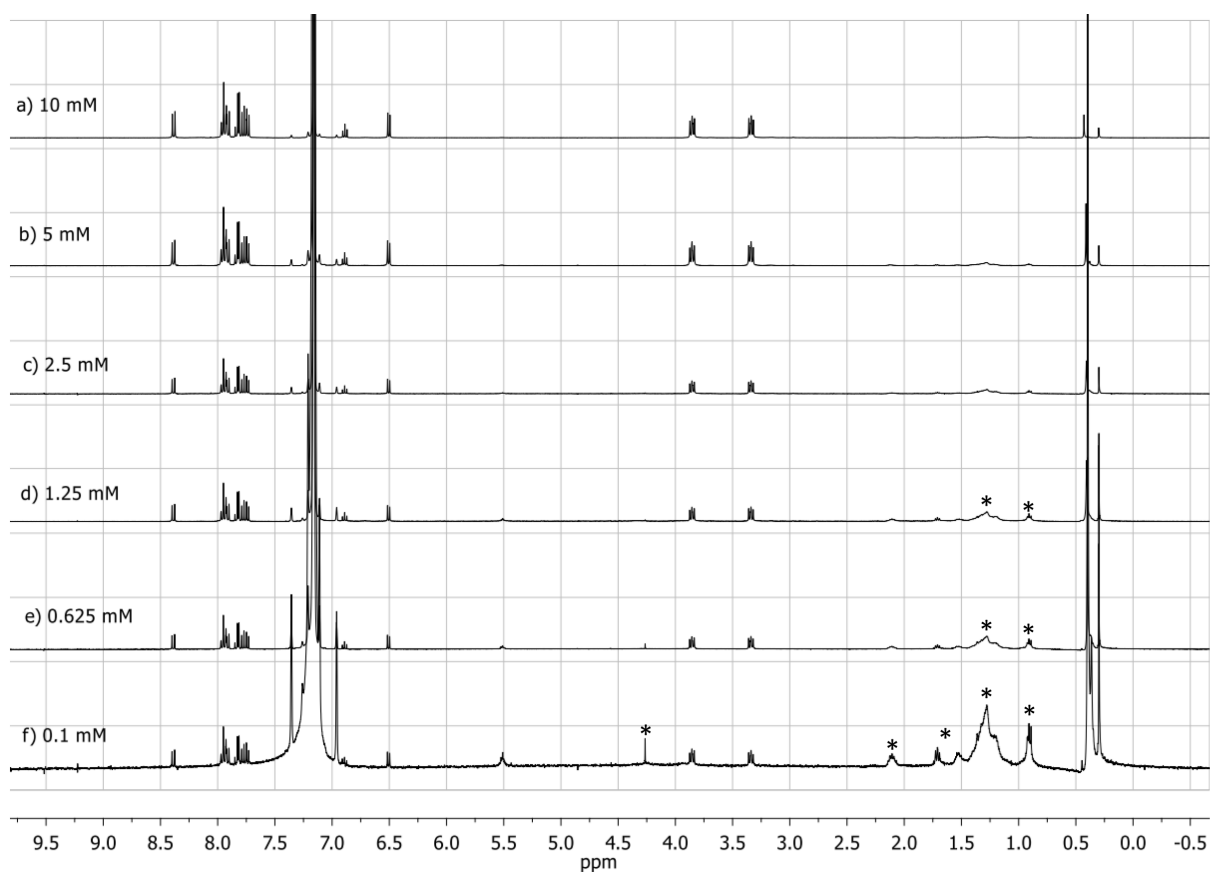

**Figure S5.** <sup>1</sup>H NMR spectra of model compound **4** at different concentrations (\* = solvent impurities).

#### Study 4. NMR titration of phenylacetic acid and model compound 4

Initially, a titration series using a solution of PAA (2.5 mM) was done with compound **4**. Unfortunately, the solubility of **4** is limited, and a maximum of only four equivalents could be added to the PAA solution:

A solution of PAA (2.5 mM) in deuterated benzene was prepared by dissolving 2.04 mg (0.0150 mmol) in 6.00 mL  $C_6D_6$ . A solution of model compound **4** (10 mM; 21.4 mg, 0.0400 mmol) was prepared in 4.00 mL  $C_6H_6$ . From this solution, the volumes (0.700 mL, 0.630 mL, 0.560 mL, 0.490 mL, 0.420 mL, 0.280 mL, 0.140 mL) were removed. The solvent was evaporated and the resulting solids dried *in vacuo*. To each of these dried samples, 0.700 mL of the PAA solution (2.5 mM) was added to obtain final samples with the following concentrations of model compound **4**: 10.0 mM, 9.00 mM, 8.00 mM, 7.0 mM, 6.0 mM, 4.0 mM, 2.0 mM.

All solutions were aged for 24 h at rt in the dark prior to recording a  $^1H$  NMR spectrum for each sample. Due to weak binding between PAA and model compound **4**, however, the binding isotherm (fitting the signal of the methylene protons of PAA) showed only a small deviation from linearity (Figure S6).

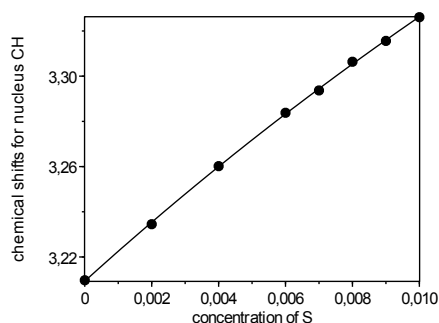

**Figure S6.** Binding isotherm for the NMR titration of PAA (constant 2.5 mM) with **4** (S) fit to a 1:1 binding model.

```
HypNMR2008
Refinement concluded at 13:23:20 on 22.04.2015
Project title: Acid/Base NMR Titration PhCH2COOH with 4
Converged in 1 iterations with sigma = 0,782655
```

|                 | value  | standard deviation | Comments |
|-----------------|--------|--------------------|----------|
| 1 log beta (SR) | 1.1956 | 0.0939             | 1.2 (9)  |

Second, a titration series using a solution of PAA (1.25 mM; 1.36 mg, 0.0100 mmol, in 8.00 mL  $C_6D_6$ ) was done, allowing the use of up to 8 equivalents **4** (Figure S7).

A solution of model compound **4** (10 mM; 26.8 mg, 0.0500 mmol) was prepared in 5.00 mL  $C_6H_6$ . From this solution, the volumes (87.5  $\mu$ L, 0.175 mL, 0.263 mL, 0.333 mL, 0.403 mL, 0.473 mL, 0.560 mL, 0.630 mL, 0.700 mL) were removed. The solvent was evaporated and the resulting solids dried *in vacuo*. To each of these dried samples, 0.700 mL of the PAA solution (1.25 mM) was added to obtain final samples with the following concentrations of model compound **4**: 1.25 mM, 2.50 mM, 3.75 mM, 4.75 mM, 5.75 mM, 6.75 mM, 8.00 mM, 9.00 mM, and 10.0 mM (solutions a–i, respectively). All solutions were aged for 24 h at rt in the dark prior to recording a  $^1H$  NMR spectrum for each sample.

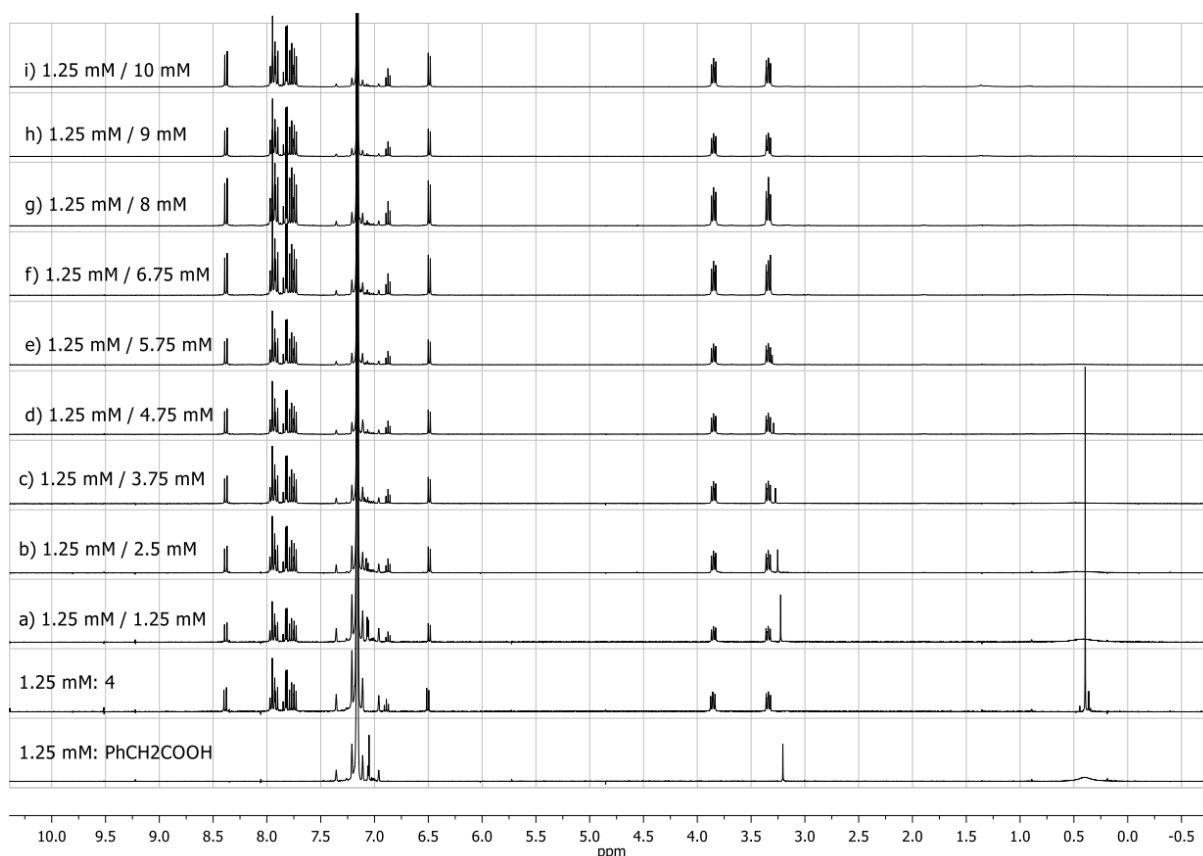

**Figure S7.**  $^1H$  NMR spectra from the NMR titration of PAA (constant 1.25 mM) and **4**.

The results of the titration of the solution of PAA (1.25 mM) with **4** are shown in Figure S8, using the chemical shifts for the signal of the methylene protons, which gives a calculated  $K_{\text{assoc}}$  (SR) = 32 M<sup>-1</sup> (log 1.5) for a 1:1 complex between PAA (R) and model compound **4** (S). The results of the titration of the solution of PAA (2.5 mM) with **4** (Figure S6) gives a calculated  $K_{\text{assoc}}$  (SR) = 16 M<sup>-1</sup> (log 1.2) for a 1:1 complex between PAA (R) and model compound **4** (S).

The final association constant of  $K_{\text{assoc}} = 24 \pm 8 \text{ M}^{-1}$  was obtained as an average from the two titrations detailed above.

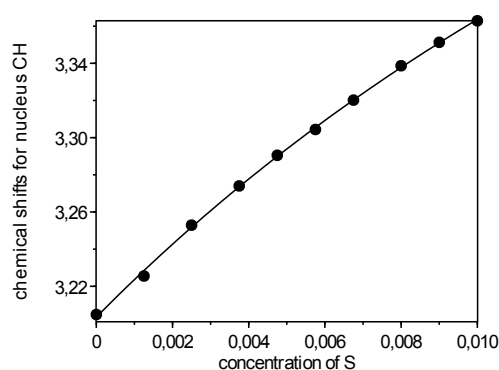

**Figure S8.** Binding isotherm for the NMR titration of PAA (constant 1.25 mM) with **4** (S) fit to a 1:1 binding model.

```
HypNMR2008
Refinement concluded at 15:50:28 on 28.02.2015
Project title: Acid/Base NMR Titration PhCH2COOH with 4
Converged in 4 iterations with sigma = 1,470918
```

|                 | value  | standard deviation | Comments |
|-----------------|--------|--------------------|----------|
| 1 log beta (SR) | 1.5008 | 0.064              | 1.5(6)   |

## Discussion

As described above (**Study 2**), Yamada et al. have reported  $K_{\text{dim}}$  (48 M<sup>-1</sup>) for PAA in benzene.<sup>3</sup> If this value is incorporated into the analysis of the titrations (1.25 and 2.5 mM PAA) and by considering a reasonable value of 3.20 ppm for the monomeric species of PAA, values of  $K_{\text{assoc}} = 38 \text{ M}^{-1}$  and  $31 \text{ M}^{-1}$  are obtained (1.25 mM and 2.5 mM, respectively). Therefore, considering  $K_{\text{dim}}$  from Yamada et al. would result in the averaged association constant of  $K_{\text{assoc}} = 35 \pm 4 \text{ M}^{-1}$ , which is nearly identical to that determined in the absence of self-association.<sup>4</sup>

### Study 5. NMR dilution titration of porphyrin 3

A solution of model compound **3** (10.0 mM; Figure S9) in deuterated benzene was prepared by dissolving **3** (16.2 mg, 0.0180 mmol) in C<sub>6</sub>D<sub>6</sub> (1.80 mL); solution (a). From this solution, 0.525 mL was removed and diluted with 0.175 mL C<sub>6</sub>D<sub>6</sub> to obtain solution (b) (7.50 mM). From solution (a), 0.600 mL was removed and diluted with 0.600 mL C<sub>6</sub>D<sub>6</sub> to obtain solution (c) (5.00 mM). Dilution was continued until solutions with the concentration of 2.5 mM (d), 1.25 mM (e), and 0.625 mM (f) were obtained. From solution (f), 0.112 mL was removed and diluted with 0.588 mL C<sub>6</sub>D<sub>6</sub> to obtain solution (g) (0.100 mM). All solutions were aged for 24 h at rt in the dark prior to recording a <sup>1</sup>H NMR spectrum (Figure S9).

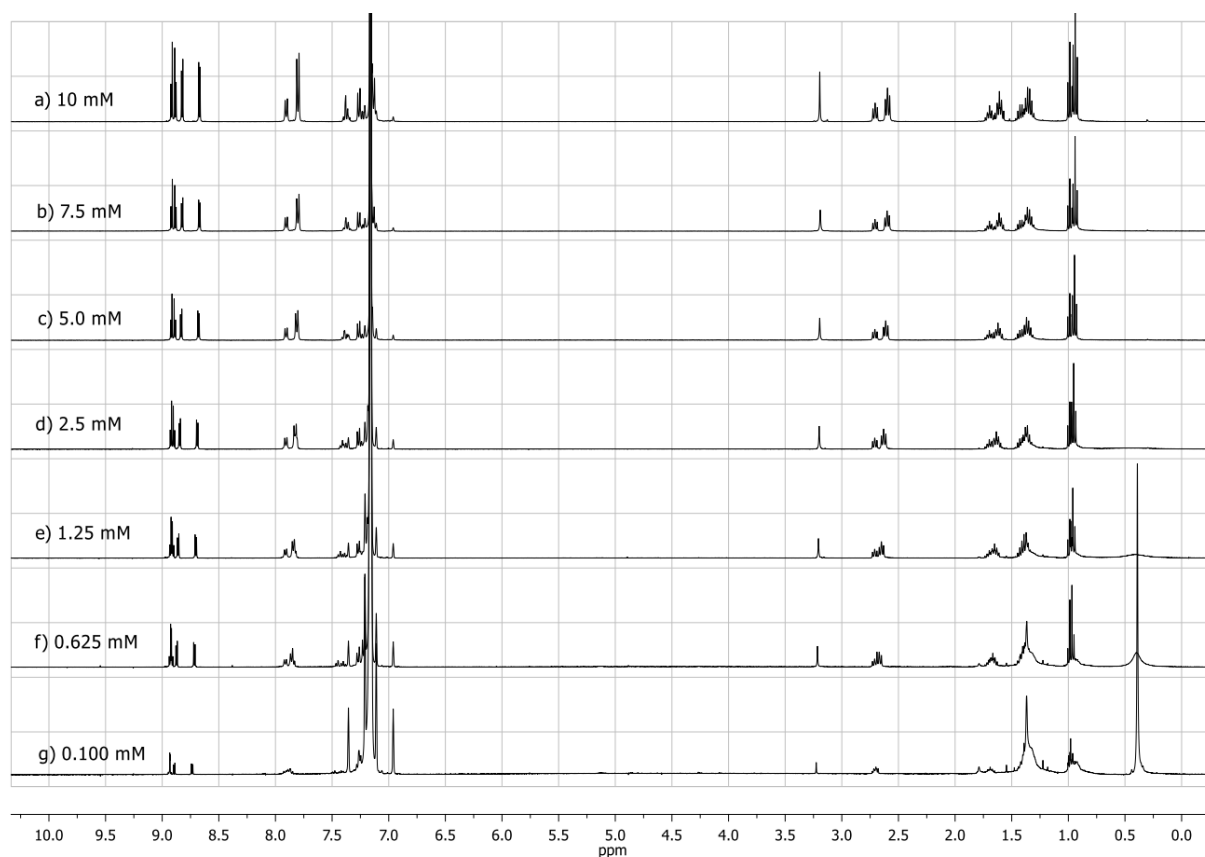

**Figure S9.** Dilution titration of porphyrin **3**.

From the dilution titration (Figure S9), a dimerization constant (R2)  $K_{\text{dim}} = 417 \text{ M}^{-1}$  (log 2.62) was calculated for porphyrin **3** using the chemical shifts for multiple signals (two sets of pyrrole protons and the methylene protons), as depicted in Figure S10.

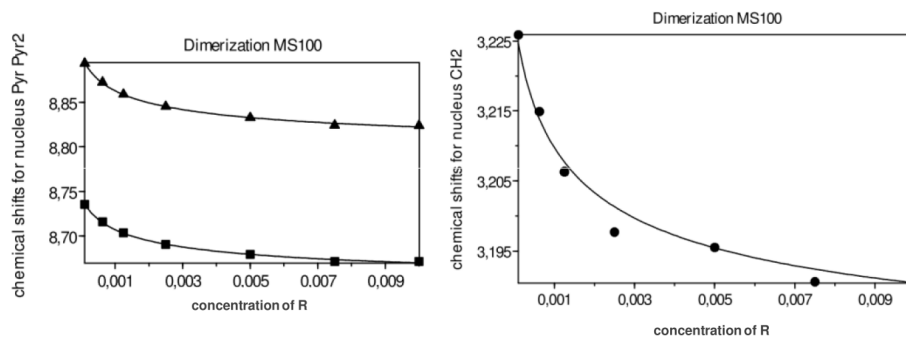

**Figure S10.** Binding isotherms from the signals of two sets of pyrrole protons (left) and the signal of the methylene protons (right) of porphyrin **3** (R) at various concentrations.

HypNMR2008  
 Refinement concluded at 13:56:23 on 09.03.2015  
 Project title: Dimerization MS100

Converged in 4 iterations with sigma = 1,010846

|                | value | standard deviation | Comments |
|----------------|-------|--------------------|----------|
| 1 log beta(R2) | 2.617 | 0.064              | 2.62(6)  |

A second dilution titration of porphyrin **3** was carried out with solutions with the following concentrations: 10 mM, 5 mM, 2.5 mM, 1.25 mM, and 0.1 mM. A dimerization constant (R2)  $K_{\text{dim}} = 363 \text{ M}^{-1}$  (log 2.56) was calculated for porphyrin **3** using the chemical shifts for multiple signals (two sets of pyrrole protons and the methylene protons), as depicted in Figure S11.

The final dimerization constant of  $K_{\text{dim}} = 390 \pm 27 \text{ M}^{-1}$  (log 2.59) was obtained as an average from the two dilution titrations.

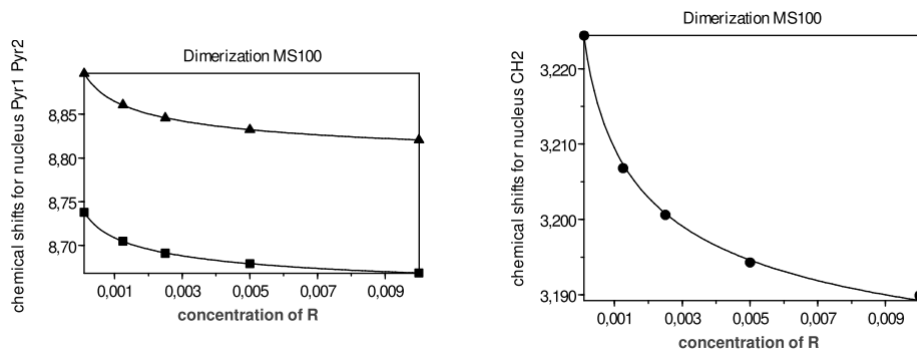

**Figure S11.** Binding isotherms from the signals of two sets of pyrrole protons (left) and the signal of the methylene protons (right) of porphyrin **3** (R) at various concentrations.

HypNMR2008  
Refinement concluded at 13:54:20 on 22.04.2015  
Project title: Dimerization MS100

Converged in 4 iterations with sigma = 0,226659

|                 | value | standard deviation | Comments |
|-----------------|-------|--------------------|----------|
| 1 log beta (R2) | 2.555 | 0.0155             | 2.55(2)  |

## Study 6. NMR titration of porphyrin 3 and pyridine

A solution of pyridine (20 mM) in deuterated benzene was prepared in analogy to the PAA + pyridine titration (**Study 2**). A solution of porphyrin **3** (10 mM) was prepared by dissolving 35.9 mg (0.0400 mmol) in 4.00 mL C<sub>6</sub>H<sub>6</sub>. From this solution, 0.175 mL was removed, the solvent evaporated, and the resulting solid dried *in vacuo*. This procedure was repeated ten times, to provide eleven samples of porphyrin **3** (1.57 mg, 1.75 μmol). Finally, each porphyrin sample was dissolved into a volume of the pyridine solution (20 mM) and pure C<sub>6</sub>D<sub>6</sub> to obtain the following mixtures:

a) porphyrin **3** (2.5 mM) / pyridine (2.5 mM)

1.57 mg **3** + 87.5 μL pyridine solution (20 mM) + 0.613 mL C<sub>6</sub>D<sub>6</sub>)

b) porphyrin **3** (2.5 mM) / pyridine (4.0 mM)

(1.57 mg **3** + 0.140 mL pyridine solution (20 mM) + 0.560 mL C<sub>6</sub>D<sub>6</sub>)

c) porphyrin **3** (2.5 mM) / pyridine (6.0 mM)

(1.57 mg **3** + 0.210 mL pyridine solution (20 mM) + 0.490 mL C<sub>6</sub>D<sub>6</sub>)

d) porphyrin **3** (2.5 mM) / pyridine (8.0 mM)

(1.57 mg **3** + 0.280 mL pyridine solution (20 mM) + 0.420 mL C<sub>6</sub>D<sub>6</sub>)

e) porphyrin **3** (2.5 mM) / pyridine (10 mM)

(1.57 mg **3** + 0.350 mL pyridine solution (20 mM) + 0.350 mL C<sub>6</sub>D<sub>6</sub>)

f) porphyrin **3** (2.5 mM) / pyridine (12 mM)

(1.57 mg **3** + 0.420 mL pyridine solution (20 mM) + 0.280 mL C<sub>6</sub>D<sub>6</sub>)

g) porphyrin **3** (2.5 mM) / pyridine (14 mM)

(1.57 mg **3** + 0.490 mL pyridine solution (20 mM) + 0.210 mL C<sub>6</sub>D<sub>6</sub>)

h) porphyrin **3** (2.5 mM) / pyridine (16 mM)

(1.57 mg **3** + 0.560 mL pyridine solution (20 mM) + 0.140 mL C<sub>6</sub>D<sub>6</sub>)



i) porphyrin **3** (2.5 mM) / pyridine (18 mM)

(1.57 mg **3** + 0.630 mL pyridine solution (20 mM) + 70.0  $\mu\text{L}$   $\text{C}_6\text{D}_6$ )

j) porphyrin **3** (2.5 mM) / pyridine (20 mM)

(1.57 mg **3** + 0.700 mL pyridine solution (20 mM))

All solutions were aged for 24 h at rt in the dark prior to recording the  $^1\text{H}$  NMR spectra (Figure S12).

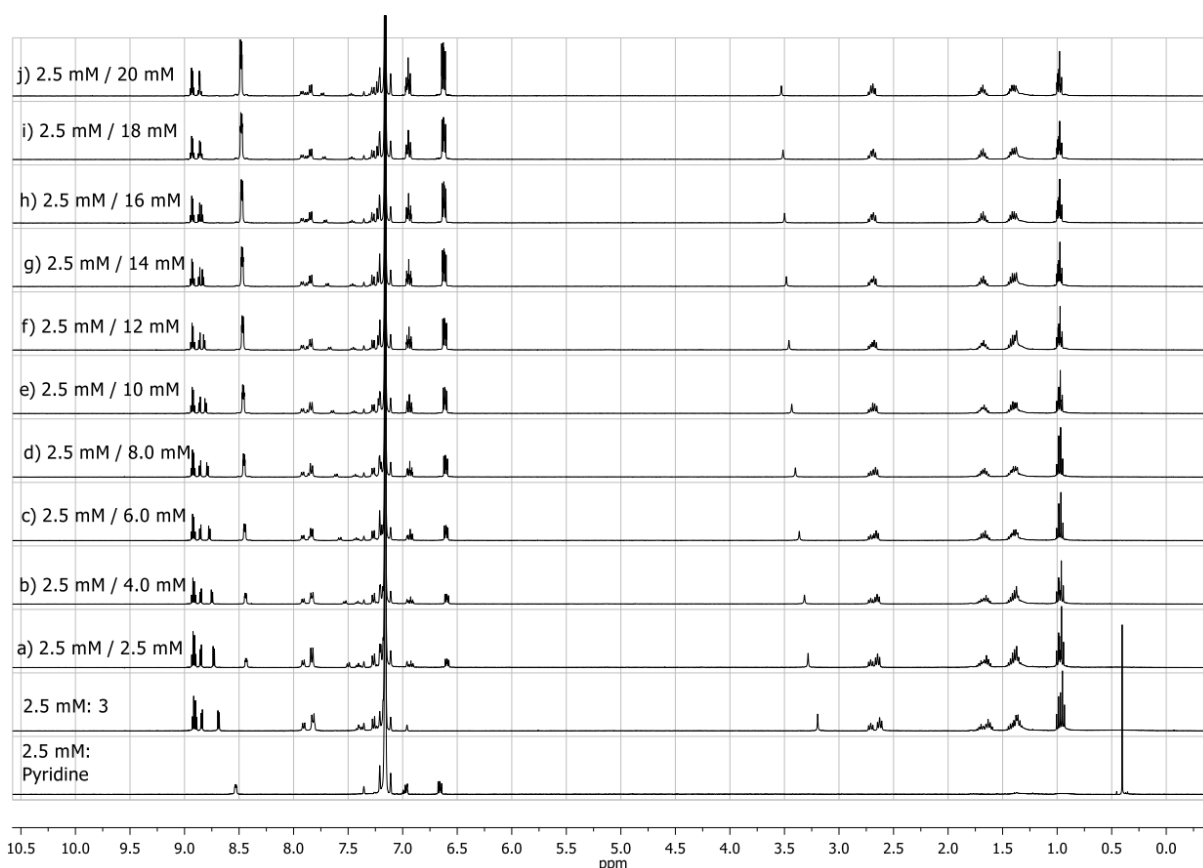

**Figure S12.** NMR titration of porphyrin **3** (constant 2.5 mM) with increasing amounts of pyridine.

The obtained chemical shifts of multiple signals (two sets of pyrrole protons and the methylene protons) were used for the calculation of  $K_{\text{assoc}}$  between porphyrin **3** and pyridine. The averaged dimerization constant (R2) determined for porphyrin **3** was included as a fixed value (log 2.59) in the calculation. Additionally, the calculated averaged chemical shifts of the methylene protons and the most upfield appearing pyrrole doublet for the free and dimeric species of porphyrin **3**, obtained from the NMR dilution titrations (**Study 5**), were included in the calculation. Using a 1:1 model,  $K_{\text{assoc}} = (\text{SR})$  of  $178 \pm 18 \text{ M}^{-1}$  (log 2.25) was determined (Figure S13).<sup>4</sup>

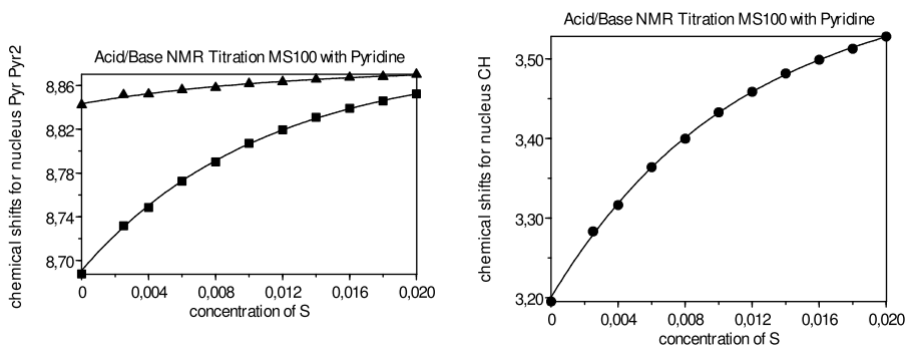

**Figure S13.** Binding isotherms from the titration of porphyrin **3** with pyridine (S).

HypNMR2008

Refinement concluded at 14:05:04 on 22.04.2015

Project title: Acid/Base NMR Titration MS100 with Pyridine

Converged in 3 iterations with sigma = 1,789513

|                 | value  | standard deviation | Comments |
|-----------------|--------|--------------------|----------|
| 1 log beta (SR) | 2.2492 | 0.009              | 2.249(9) |
| log beta (R2)   | 2.59   | fixed              |          |

### Study 7. NMR titration of porphyrin **3** and model compound **4**

A solution of model compound **4** (5.00 mM; 4.82 mg, 0.00900 mmol) was prepared in 1.80 mL C<sub>6</sub>D<sub>6</sub>. From this solution, 0.175 mL was removed, the solvent evaporated, and the resulting solid dried *in vacuo*. This procedure was repeated nine times, to provide ten samples of model compound **4** (0.469 mg, 0.875 μmol).

A solution of porphyrin **3** (2.50 mM; 1.57 mg, 0.00175 mmol) was prepared in C<sub>6</sub>D<sub>6</sub> (0.700 mL). Additionally, a dried sample of compound **4** was dissolved in 0.700 mL C<sub>6</sub>D<sub>6</sub>. Both samples were aged for 24 h at rt in the dark and the <sup>1</sup>H NMR spectra were recorded (Figure S14).

A dried sample of compound **4** (0.469 mg, 0.875 μmol) was dissolved in the already prepared solution of porphyrin **3** (2.50 mM), maintaining a total volume of 0.7 mL, to give solution (a) (**3** / **4** = 2.5 mM / 1.25 mM; Figure S14). The solution was aged for 24 h at rt in the dark, and a <sup>1</sup>H NMR spectrum was recorded. This procedure was repeated for further seven samples of **4** until a 10 mM concentration of model compound **4** was achieved (solutions b–h, respectively).

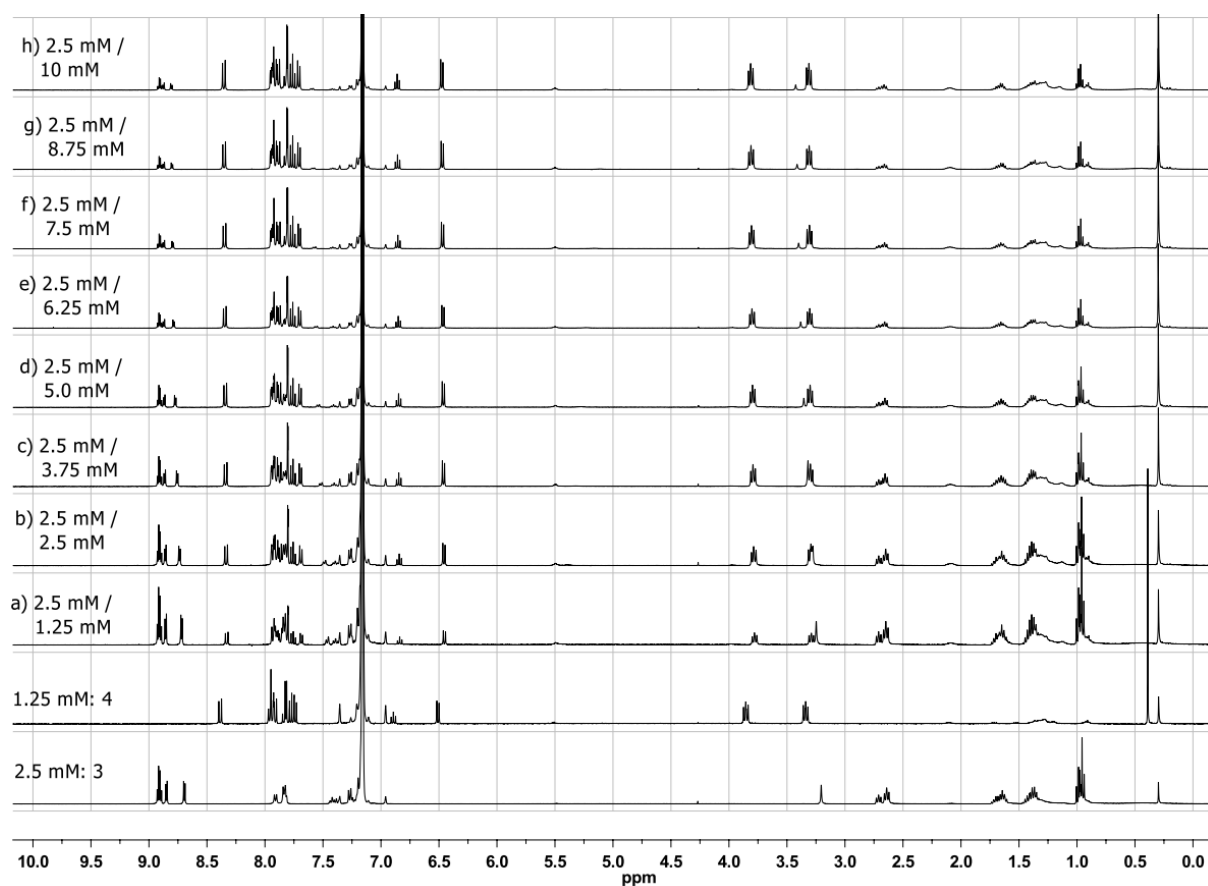

**Figure S14.**  $^1\text{H}$  NMR spectra from the titration of porphyrin **3** (constant 2.5 mM) with compound **4**.

For the determination of the association constant between porphyrin **3** (R) and model compound **4** (S), nonlinear curve fitting with a 1:1 and a 1:2 binding isotherm (**3**:**4**) was applied. The chemical shifts of multiple signals (two sets of pyrrole protons and the methylene protons of **3**), obtained from the  $^1\text{H}$  NMR titration with **4**, were used for the determination of the association constants.<sup>4</sup> The calculated averaged chemical shifts of the signals for the methylene protons and the most upfield appearing pyrrole doublet for the free and dimeric species of porphyrin **3**, obtained from the NMR dilution titration, were included in the calculations. Additionally, the dimerization constant (R2) determined for porphyrin **3** (**Study 5**) was included as a fixed value (log 2.59) in the calculations.

## Binding Isotherms with 1:1 Model

Using a 1:1 binding isotherm,  $K_{\text{assoc}}$  (SR) of  $316 \pm 32 \text{ M}^{-1}$  (log 2.50) was determined (Figure S15).

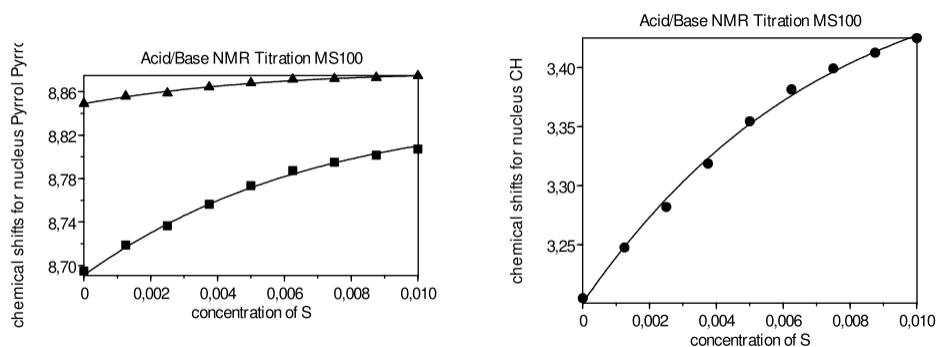

**Figure S15.** Binding isotherms from the titration of porphyrin **3** with compound **4** (S).

HypNMR2008  
Refinement concluded at 14:14:17 on 22.04.2015  
Project title: Acid/Base NMR Titration MS100

Converged in 4 iterations with sigma = 2,945437

|                 | value  | standard deviation | Comments |
|-----------------|--------|--------------------|----------|
| 1 log beta (SR) | 2.5017 | 0.0312             | 2.5(3)   |
| log beta (R2)   | 2.59   | fixed              |          |

## Binding Isotherms with 1:2 Model

Using a 1:2 binding isotherm, an overall association constant  $\beta$  (S2R) of  $1.23 \pm 0.1 \times 10^6 \text{ M}^{-2}$  (log 6.09) was determined (Figure S16).

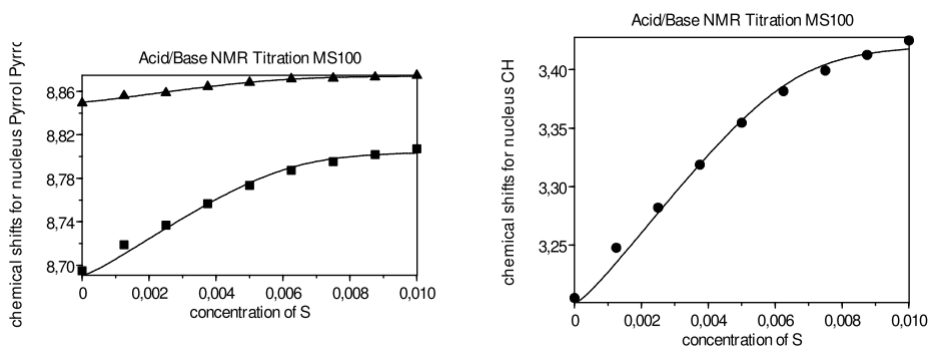

**Figure S16.** Binding isotherms from the titration of porphyrin **3** with compound **4** (S).

HypNMR2008  
Refinement concluded at 14:17:58 on 22.04.2015  
Project title: Acid/Base NMR Titration MS100

Converged in 5 iterations with sigma = 4,584334

|                  | value  | standard deviation | Comments |
|------------------|--------|--------------------|----------|
| 1 log beta (S2R) | 6.0872 | 0.0771             | 6.09(8)  |
| log beta (R2)    | 2.59   | fixed              |          |

## Study 8. Job's Plot

Following mixtures of porphyrin **3** and model compound **4** were prepared, each in C<sub>6</sub>D<sub>6</sub> (0.7 mL): a) 0.85 mM **3** (0.53 mg) / 9.15 mM **4** (3.43 mg); b) 1.2 mM **3** (0.75 mg) / 8.8 mM **4** (3.30 mg); c) 1.7 mM **3** (1.07 mg) / 8.3 mM **4** (3.11 mg); d) 2.5 mM **3** (1.57 mg) / 7.5 mM **4** (2.81 mg); e) 3.33 mM **3** (2.09 mg) / 6.66 mM **4** (2.49 mg); f) 4.1 mM **3** (2.60 mg) / 5.9 mM **4** (2.21 mg); g) 5 mM **3** (3.14 mg) / 5 mM **4** (1.88 mg); h) 6.66 mM **3** (4.18 mg) / 3.33 mM **4** (1.25 mg); i) 8.3 mM **3** (5.22 mg) / 1.7 mM **4** (0.63 mg). All solutions were aged for 24 h at rt in the dark prior to recording the corresponding <sup>1</sup>H NMR spectra (Figure S17).

Job's method of continuous variation shows formation of a 1:2 complex between **3** and **4** (Figure S18).

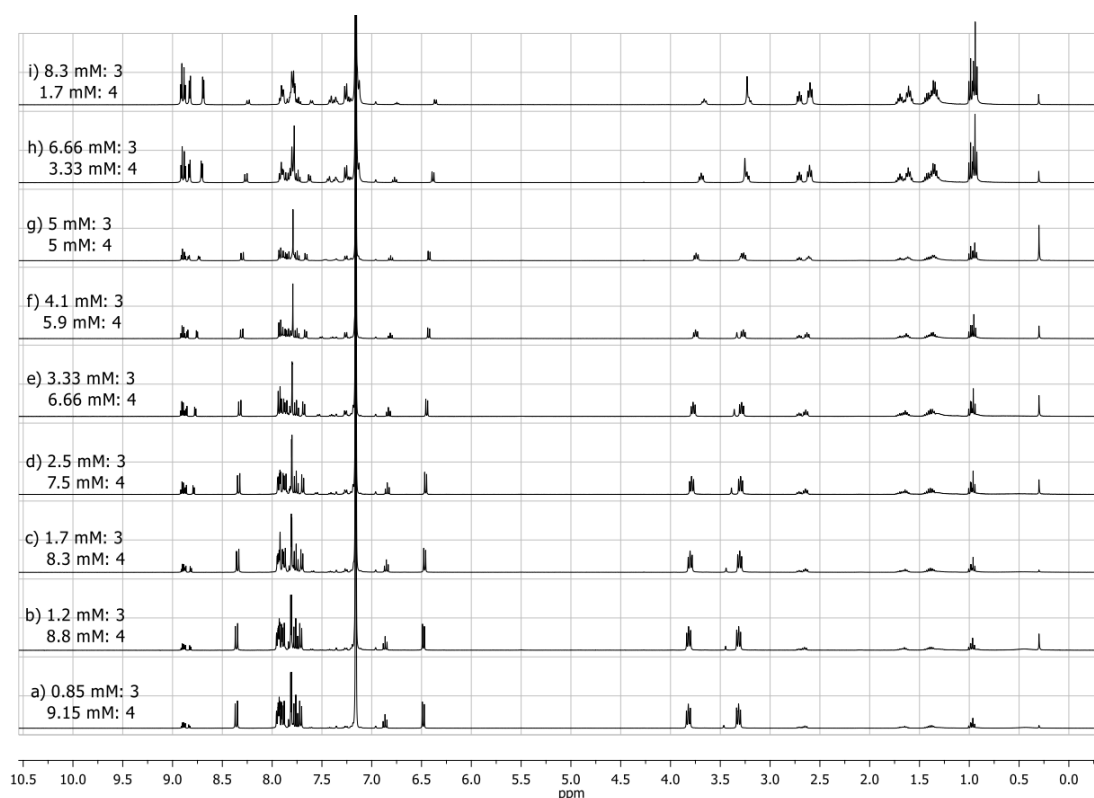

**Figure S17.** <sup>1</sup>H NMR spectra (400 MHz, C<sub>6</sub>D<sub>6</sub>) of **3** and **4**, maintaining a constant total concentration of 10 mM.

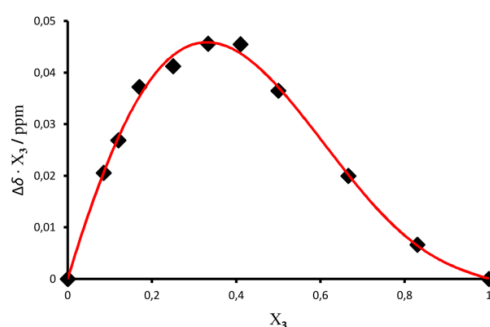

**Figure S18.** Job plot of porphyrin **3** and model compound **4**.

## Mass spectrometry of 3•4

APPI HRMS of a mixture of **3** (C<sub>58</sub>H<sub>54</sub>N<sub>4</sub>NiO<sub>2</sub>) and **4** (C<sub>41</sub>H<sub>29</sub>N) shows beside the individual molecular ions a weak signal for formation of a 1:1 complex (C<sub>99</sub>H<sub>83</sub>N<sub>5</sub>NiO<sub>2</sub>) in the gas phase (Figure S19). Another stoichiometry was not observed.

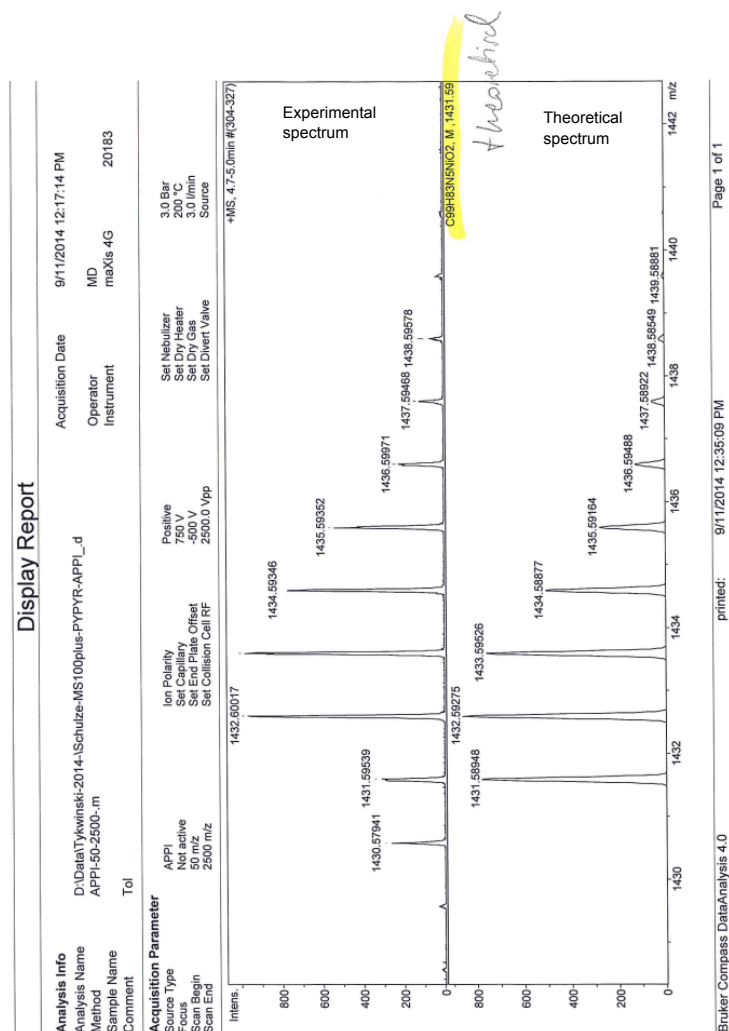

**Figure S19.** APPI HRMS analysis of a mixture between porphyrin **3** and model compound **4**.

1. P. Gans, *HypNMR 2008*, Protonic Software, **2008**; <http://www.hyperquad.co.uk/hypnrmr.htm>.
2. The dimerization of phenylacetic acid in CDCl<sub>3</sub> has been reported Sanders and coworkers: N. Ponnuswamy, G. D. Pantoş, M. M. J. Smulders and J. K. M. Sanders, *J. Am. Chem. Soc.*, 2012, **134**, 566–573.
3. The dimerization of phenylacetic acid in C<sub>6</sub>H<sub>6</sub> has been measured by partition: H. Yamada, Y. Taguchi and H. Wada, *Talanta*, 1994, **41**, 573–579.
4. Values are given with an estimated error of ±10%.
5. Very small concentration dependent chemical shifts (linear behavior, ca. 0.003 ppm in total comparing the 10 mM and the 0.1 mM solution) for all signals were observed.
